# Supplementary material for: Observational retrospective study calculating health service costs of patients receiving surgery for chronic rhinosinusitis in England, using linked patient-level primary and secondary care electronic data
Source: PubMed Central journal article supplement (PMC8830221; doi:10.1136/bmjopen-2021-055603), 2022-02-08

**Title:****Observational retrospective study calculating health service costs of patients receiving surgery for chronic rhinosinusitis in England, using linked patient-level primary and secondary care electronic data****Authors:**

Caroline S Clarke\* ([caroline.clarke@ucl.ac.uk](mailto:caroline.clarke@ucl.ac.uk)), Elizabeth Williamson, Spiros Denaxas, James R Carpenter, Mike Thomas, Helen Blackshaw, Anne GM Schilder, Carl Philpott, Claire Hopkins and Stephen Morris, on behalf of the MACRO programme team

**Supplementary Materials****A. Section A – Codelists****i. CRS diagnostic terms – definite CRS**

The following codelist was developed to identify patients with chronic rhinosinusitis, according to “definite” diagnostic events. Patients with one or more of these diagnoses or procedures recorded during follow-up were considered to be definite CRS cases, with the date of diagnosis taken to be the date of the first such diagnosis or procedure.

| Code type                                   | ICD-10 Code    |                  | Description (“definite” CRS diagnosis) |
|---------------------------------------------|----------------|------------------|----------------------------------------|
| <b>ICD-10</b>                               | J32            |                  | Chronic sinusitis                      |
|                                             | J320           |                  | Chronic maxillary sinusitis            |
|                                             | J321           |                  | Chronic frontal sinusitis              |
|                                             | J322           |                  | Chronic ethmoidal sinusitis            |
|                                             | J323           |                  | Chronic sphenoidal sinusitis           |
|                                             | J324           |                  | Chronic pansinusitis                   |
|                                             | J328           |                  | Other chronic sinusitis                |
|                                             | J329           |                  | Chronic sinusitis, unspecified         |
|                                             | J33            |                  | Nasal polyp                            |
|                                             | J330           |                  | Polyp of nasal cavity                  |
|                                             | <b>MEDCODE</b> | <b>Read code</b> |                                        |
| <b>MEDCODE with corresponding Read Code</b> | 811            | 7406000          | Nasal polypectomy                      |
|                                             | 848            | 7411200          | Intranasal antrostomy                  |
|                                             | 977            | H110.00          | Polyp of nasal cavity                  |
|                                             | 1673           | 7412100          | Intranasal ethmoidectomy               |
|                                             | 1674           | H132.00          | Chronic ethmoidal sinusitis            |
|                                             | 2257           | H13..00          | Chronic sinusitis                      |
|                                             | 4433           | H130.00          | Chronic maxillary sinusitis            |
|                                             | 4686           | H11..00          | Nasal polyps                           |
|                                             | 5437           | H13z.00          | Chronic sinusitis NOS                  |
|                                             | 6411           | 2D33.00          | O/E - nasal polyp present              |

|             |       |                  |                                                             |
|-------------|-------|------------------|-------------------------------------------------------------|
|             | 6491  | 7416             | FESS/Therapeutic endoscopy of nose and sinus                |
|             | 7243  | 7.42E+03         | FESS/Post operative division of adhesions                   |
|             | 8220  | 7416300          | FESS/Uncinectomy                                            |
|             | 10546 | H13..11          | Chronic rhinosinusitis                                      |
|             | 11744 | H11y100          | Polyp of ethmoidal sinus                                    |
|             | 14749 | H110z00          | Polyp of nasal cavity NOS                                   |
|             | 14888 | H11z.00          | Nasal polyp NOS                                             |
|             | 15163 | H131.00          | Chronic frontal sinusitis                                   |
|             | 16626 | 7416D00          | FESS - post operative removal of polyps (local anaesthetic) |
|             | 17173 | H135.00          | Recurrent sinusitis                                         |
|             | 18083 | 7416C00          | FESS - post operative suction clearance (local anaesthetic) |
|             | 18869 | 7416900          | FESS/Antrostomy via middle meatus                           |
|             | 19742 | H11y.11          | Nasal sinus polyps                                          |
|             | 20806 | 7415.11          | FESS - diagnostic nasal antroscopy                          |
|             | 20832 | 7416500          | FESS/Anterior ethmoidectomy                                 |
|             | 21213 | 7412700          | Radical frontal sinus antrostomy                            |
|             | 21923 | 7416.11          | FESS/Therapeutic nasal antroscopy                           |
|             | 27869 | 7412800          | Frontal sinusotomy NEC                                      |
|             | 30990 | S832300          | Open wound of nasal sinus                                   |
|             | 33709 | 7415z00          | FESS/Diagnostic endoscopy of nose or sinus NOS              |
|             | 33922 | 7416700          | FESS/Anterior and posterior ethmoidectomy                   |
|             | 34165 | 7412300          | Transantral ethmoidectomy                                   |
|             | 34973 | 7416z00          | FESS - therapeutic endoscopy of nose or sinus NOS           |
|             | 35389 | 7416B00          | FESS/Excisional surgery to middle turbinate                 |
|             | 35897 | H11y200          | Polyp of maxillary sinus                                    |
|             | 37481 | 7416800          | FESS/Sphenoidectomy                                         |
|             | 39501 | H13y000          | Chronic pansinusitis                                        |
|             | 42166 | 7416F00          | Functional endoscopic sinus surg - polypectomy nasal sinus  |
|             | 45995 | 7416y00          | FESS - therapeutic endoscopy of nose or sinus OS            |
|             | 46336 | 7416A00          | FESS/Antrostomy via inferior meatus                         |
|             | 48703 | H133.00          | Chronic sphenoidal sinusitis                                |
|             | 49348 | 7416600          | FESS/Anterior ethmoidectomy and frontal recess dissection   |
|             | 49548 | H13y.00          | Other chronic sinusitis                                     |
|             | 54375 | H13yz00          | Other chronic sinusitis NOS                                 |
|             | 59019 | 7416400          | FESS/Uncinectomy and excision of bulla                      |
|             | 59339 | 7415200          | FESS - diagnostic antroscopy via middle meatus              |
|             | 61281 | H11y300          | Polyp of sphenoidal sinus                                   |
|             | 62936 | 7416200          | FESS/Therapeutic antroscopy via middle meatus               |
|             | 63733 | Hyu2200          | [X]Other chronic sinusitis                                  |
|             | 64359 | 7412y00          | Other specified operation on frontal sinus                  |
|             | 68003 | 7M1B000          | Functional endoscopic sinus surgery                         |
|             | 69714 | 7406700          | Nasal polypectomy using auto-debrider                       |
|             | 86064 | 7M1B100          | Functional endoscopic nasal surgery                         |
|             |       | <b>OPCS code</b> |                                                             |
| <b>OPCS</b> | E081  |                  | Polypectomy of internal nose                                |
|             | E133  |                  | Intranasal antrostomy                                       |
|             | E142  |                  | Intranasal ethmoidectomy                                    |
|             | Y761  |                  | Functional endoscopic sinus surgery                         |
|             | Y762  |                  | Functional endoscopic nasal surgery                         |

## ii. CRS surgery terms – definite or very likely CRS surgery

The subgroup of surgical patients were those who had also undergone surgery that was “definitely” or “very likely” to have been for CRS and the codelist for “very likely” CRS surgery is given in a second table below.

| Code type | Code                                          | Description (“very likely” CRS surgery)              |
|-----------|-----------------------------------------------|------------------------------------------------------|
| OPCS      | E13                                           | Other operations on maxillary antrum                 |
|           | E131                                          | Drainage of maxillary antrum NEC                     |
|           | E132                                          | Excision of lesion of maxillary antrum               |
|           | E136                                          | Puncture of maxillary antrum                         |
|           | E138                                          | Other specified other operations on maxillary antrum |
|           | E139                                          | Unspecified other operations on maxillary antrum     |
|           | E14                                           | Operations on frontal sinus                          |
|           | E144                                          | Transantral ethmoidectomy                            |
|           | E147                                          | Median drainage of frontal sinus                     |
|           | E148                                          | Other specified operations on frontal sinus          |
|           | E149                                          | Unspecified operations on frontal sinus              |
|           | E15                                           | Operations on sphenoid sinus                         |
|           | E151                                          | Drainage of sphenoid sinus                           |
|           | E152                                          | Puncture of sphenoid sinus                           |
|           | E158                                          | Other specified operations on sphenoid sinus         |
|           | E159                                          | Unspecified operations on sphenoid sinus             |
|           | E16                                           | Other operations on frontal sinus                    |
|           | E161                                          | Frontal sinus osteoplasty                            |
|           | E162                                          | Drainage of frontal sinus NEC                        |
|           | E168                                          | Other specified other operations on frontal sinus    |
| E169      | Unspecified other operations on frontal sinus |                                                      |

### iii. Polyp diagnostic terms

The codelist for determining whether a patient was categorised as being in the positive-polyps subgroup or the unknown-polyps subgroup is below. Those patients exhibiting one or more of these codes were classified as “polyps positive” and those lacking these codes were “polyps unknown”.

| Code type | Code                   | Description (“positive polyps”)                             |
|-----------|------------------------|-------------------------------------------------------------|
| ICD-10    | J33                    | Nasal polyp                                                 |
|           | J330                   | Polyp of nasal cavity                                       |
|           | J331                   | Polypoid sinus degeneration                                 |
|           | J338                   | Other polyp of sinus                                        |
|           | J339                   | Nasal polyp, unspecified                                    |
| MEDCODE   | 11744                  | Polyp of ethmoidal sinus                                    |
|           | 14749                  | Polyp of nasal cavity NOS                                   |
|           | 14888                  | Nasal polyp NOS                                             |
|           | 16626                  | FESS - post operative removal of polyps (local anaesthetic) |
|           | 19742                  | Nasal sinus polyps                                          |
|           | 24535                  | Removal of antrochoanal polyp                               |
|           | 35897                  | Polyp of maxillary sinus                                    |
|           | 42166                  | Functional endoscopic sinus surg - polypectomy nasal sinus  |
|           | 4341                   | Antral (maxillary) polyp                                    |
|           | 44518                  | Other polyp of sinus NOS                                    |
|           | 44934                  | Polypoid sinus degeneration                                 |
|           | 4686                   | Nasal polyps                                                |
|           | 50528                  | Polypoid sinus degeneration NOS                             |
|           | 61281                  | Polyp of sphenoidal sinus                                   |
|           | 6411                   | O/E - nasal polyp present                                   |
|           | 69714                  | Nasal polypectomy using auto-debrider                       |
|           | 811                    | Nasal polypectomy                                           |
| 91482     | Polyp of frontal sinus |                                                             |
| 977       | Polyp of nasal cavity  |                                                             |
| OPCS      | E081                   | Polypectomy of internal nose                                |

#### iv. Flowchart illustrating the application of the codelists in this section of the Supplementary Materials

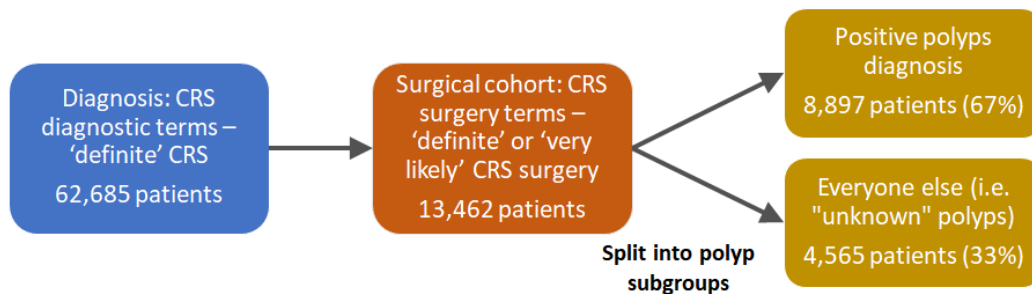**CRS diagnostic terms:**

Defined as described in Supplementary Materials Section A

**CRS surgery terms:**

Defined as described in Supplementary Materials Section A

**Polyp diagnostic terms:**

Defined as described in Supplementary Materials Section A

## B. Section B – Unit costs and other input information

| NHS Reference Cost categories<br>(2017-18 prices)                                   | Inpatient (APC) events                 |                           | Outpatient<br>(OP) events   | OPCS/ICD-10 code(s)                                                                                                    |
|-------------------------------------------------------------------------------------|----------------------------------------|---------------------------|-----------------------------|------------------------------------------------------------------------------------------------------------------------|
|                                                                                     | Elective<br>Inpatient unit<br>cost (£) | Day Case<br>unit cost (£) | Outpatient<br>unit cost (£) |                                                                                                                        |
| Complex sinus procedure                                                             | £3,972.25                              | £2,383.70                 | £114.23                     | E147, E152, E153                                                                                                       |
| Major Sinus Procedures                                                              | £2,918.76                              | £2,298.06                 | £118.52                     | E131, E132, E141, E143,<br>E144, E146, E148, E149,<br>E151, E154, E158, E159,<br>E161, E162, E168, E169,<br>E171, E172 |
| Intermediate Sinus Procedures                                                       | £2,536.77                              | £1,920.27                 | £145.73                     | E133, E138, E139, E142,<br>E178, E179, Y403, Y761,<br>Y762, Z238, Z239                                                 |
| Minor Sinus Procedures                                                              | £2,320.64                              | £1,654.96                 | £113.14                     | E136                                                                                                                   |
| Intermediate Nose Procedures                                                        | £2,241.99                              | £1,128.15                 | £164.98                     | E058, E059, E088, E089,<br>E108, E109, Y408, Y409,<br>Z228, Z229                                                       |
| Nasal Polypectomy                                                                   | £2,193.28                              | £1,587.09                 | £130.83                     | E081                                                                                                                   |
| Minor Nose Procedures                                                               | £1,876.76                              | £1,325.83                 | £148.90                     | E061, E062, E063, E064,<br>E068, E069                                                                                  |
| Excision or Biopsy, of Lesion of<br>Internal Nose                                   | £1,748.75                              | £1,054.22                 | £144.62                     | E082, E101, E134                                                                                                       |
| Other Specified Diagnostic<br>Imaging of Other Sites, 19 years<br>and over          | £214.29                                | £214.29                   | £214.29                     | U064, U068, U069, U217                                                                                                 |
| Computerised Tomography<br>Scan of One Area, without<br>Contrast, 19 years and over | £88.21                                 | £88.21                    | £88.21                      | U051, U061, U212                                                                                                       |

**Table B1. Unit costs, inpatient and outpatient health care contacts, from published NHS Reference Costs [23]. Prices in 2017-2018 £.**

| <b>Mean duration of visit, minutes</b> | <b>GP</b> | <b>Nurse/Other</b> | <b>References</b> |
|----------------------------------------|-----------|--------------------|-------------------|
| Standard consultation visit            | 9.22      | 9.22               | [24]              |
| Specific clinic or home visit          | 17.20     | 17.20              | [25]              |
| Telephone call                         | 7.10      | 7.10               | [25]              |
| <b>Unit cost per visit</b>             |           |                    |                   |
| Standard consultation visit            | £37.34    | £6.45              | [24]              |
| Specific clinic or home visit          | £69.66    | £12.04             | [24]              |
| Telephone call                         | £28.76    | £4.97              | [24]              |

**Table B2. Unit costs, primary care consultations. Including information on the duration of a contact, and the unit cost calculated on that basis. Prices in 2017-2018 £.**

| <b>Antibiotics</b>     | <b>Unit cost</b> |
|------------------------|------------------|
| Cephalosporin          | £4.97            |
| Macrolide              | £6.64            |
| Metronidazole          | £2.13            |
| Penicillin             | £1.42            |
| Quinolone              | £2.45            |
| Tetracycline           | £8.57            |
| Other antibiotic       | £4.36            |
| <b>Non-antibiotics</b> |                  |
|                        | <b>Unit cost</b> |
| Corticosteroids        | £8.08            |
| All other drugs        | £4.69            |

**Table B3. Unit costs of primary care medications, using the British National Formulary (BNF) online [26]. Prices in 2017-2018 £.**

### C. Section C – Numbers of patients “at risk” of a primary care, outpatient, or inpatient care event, centred on surgery date at midpoint of Q0

|                              |     |     |     |     |    |   |   |    |    |    |    |
|------------------------------|-----|-----|-----|-----|----|---|---|----|----|----|----|
| <b>Years from surgery</b>    | -10 | -8  | -6  | -4  | -2 | 0 | 2 | 4  | 6  | 8  | 10 |
| <b>Quarters from surgery</b> | -40 | -32 | -24 | -16 | -8 | 0 | 8 | 16 | 24 | 32 | 40 |

#### Numbers "at risk" of primary care consultation/prescription event

|                        |      |      |      |      |             |              |              |      |      |      |      |
|------------------------|------|------|------|------|-------------|--------------|--------------|------|------|------|------|
| <b>Positive polyps</b> | 1551 | 2489 | 3606 | 4995 | <b>6697</b> | <b>9056</b>  | <b>7028</b>  | 5443 | 4109 | 2896 | 1897 |
| <b>Unknown polyps</b>  | 812  | 1250 | 1773 | 2451 | <b>3289</b> | <b>4406</b>  | <b>3199</b>  | 2365 | 1689 | 1182 | 783  |
| <b>All patients</b>    | 2363 | 3739 | 5379 | 7446 | <b>9986</b> | <b>13462</b> | <b>10227</b> | 7808 | 5798 | 4078 | 2680 |

#### Numbers "at risk" of inpatient care event

|                        |      |      |      |      |             |              |             |      |      |      |      |
|------------------------|------|------|------|------|-------------|--------------|-------------|------|------|------|------|
| <b>Positive polyps</b> | 1451 | 2362 | 3434 | 4804 | <b>6460</b> | <b>8689</b>  | <b>6713</b> | 5242 | 4048 | 2930 | 2007 |
| <b>Unknown polyps</b>  | 768  | 1198 | 1717 | 2360 | <b>3163</b> | <b>4205</b>  | <b>3239</b> | 2408 | 1744 | 1247 | 833  |
| <b>All patients</b>    | 2219 | 3560 | 5151 | 7164 | <b>9623</b> | <b>12894</b> | <b>9952</b> | 7650 | 5792 | 4177 | 2840 |

#### Numbers "at risk" of outpatient care event

|                        |   |   |   |   |             |              |             |    |   |   |   |
|------------------------|---|---|---|---|-------------|--------------|-------------|----|---|---|---|
| <b>Positive polyps</b> | 0 | 0 | 0 | 0 | <b>1135</b> | <b>8755</b>  | <b>2962</b> | 9  | 0 | 0 | 0 |
| <b>Unknown polyps</b>  | 0 | 0 | 0 | 0 | <b>633</b>  | <b>4242</b>  | <b>1234</b> | 5  | 0 | 0 | 0 |
| <b>All patients</b>    | 0 | 0 | 0 | 0 | <b>1768</b> | <b>12997</b> | <b>4196</b> | 14 | 0 | 0 | 0 |

Table C1. Numbers of patients “at risk” of a primary care, outpatient, or inpatient care event, centred on surgery date.



## D. Section D – Mean inpatient costs per person-quarter, centred on surgery date at midpoint of Q0

Polypectomy costs were not split into DC and EL categories according to the length of stay as that regression did not converge, so instead a weighted cost was used according to the proportion of DC and EL polypectomies (32.8% DC and 67.2% EL).

| Quarters after surgery (surgery date is at centre of Q0) | CT/other imaging, DC | Minor nose incl. biopsy, DC | Int nose and Minor sinus, DC | Int/Major/Complex sinus, DC | CT/other imaging, EL | Minor nose incl. biopsy, EL | Int nose and Minor sinus, EL | Int/Major/Complex sinus, EL | Polypectomy | TOTAL          |
|----------------------------------------------------------|----------------------|-----------------------------|------------------------------|-----------------------------|----------------------|-----------------------------|------------------------------|-----------------------------|-------------|----------------|
| -8                                                       | 0.00                 | 0.35                        | 0.00                         | 0.61                        | 0.08                 | 0.57                        | 0.00                         | 0.00                        | 0.00        | <b>1.62</b>    |
| -7                                                       | 0.03                 | 0.00                        | 0.00                         | 0.00                        | 0.08                 | 0.00                        | 0.00                         | 1.56                        | 0.00        | <b>1.66</b>    |
| -6                                                       | 0.08                 | 0.00                        | 0.00                         | 0.00                        | 0.08                 | 0.00                        | 0.67                         | 0.00                        | 0.00        | <b>0.82</b>    |
| -5                                                       | 0.07                 | 0.32                        | 0.00                         | 1.10                        | 0.27                 | 2.07                        | 0.65                         | 1.46                        | 0.00        | <b>5.93</b>    |
| -4                                                       | 0.14                 | 0.00                        | 0.42                         | 0.53                        | 0.21                 | 0.50                        | 0.00                         | 0.70                        | 0.00        | <b>2.52</b>    |
| -3                                                       | 0.05                 | 0.00                        | 0.41                         | 0.00                        | 0.23                 | 0.96                        | 0.00                         | 0.68                        | 0.00        | <b>2.33</b>    |
| -2                                                       | 0.04                 | 0.28                        | 0.00                         | 0.99                        | 0.13                 | 0.46                        | 0.00                         | 3.28                        | 0.00        | <b>5.20</b>    |
| -1                                                       | 0.02                 | 0.82                        | 0.38                         | 0.48                        | 0.34                 | 0.89                        | 0.00                         | 3.79                        | 0.00        | <b>6.73</b>    |
| <b>0</b>                                                 | <b>0.16</b>          | <b>8.62</b>                 | <b>43.86</b>                 | <b>243.32</b>               | <b>0.86</b>          | <b>29.10</b>                | <b>110.97</b>                | <b>680.49</b>               | <b>0.00</b> | <b>1117.37</b> |
| <b>1</b>                                                 | 0.00                 | 0.00                        | 0.38                         | 3.36                        | 0.08                 | 0.89                        | 1.11                         | 5.74                        | 0.00        | <b>11.56</b>   |
| <b>2</b>                                                 | 0.00                 | 0.28                        | 1.17                         | 1.49                        | 0.02                 | 0.00                        | 0.00                         | 3.96                        | 0.00        | <b>6.92</b>    |
| <b>3</b>                                                 | 0.00                 | 0.29                        | 1.22                         | 1.54                        | 0.02                 | 0.00                        | 0.60                         | 4.10                        | 0.00        | <b>7.77</b>    |
| <b>4</b>                                                 | 0.00                 | 0.30                        | 0.42                         | 1.59                        | 0.02                 | 0.00                        | 1.84                         | 9.86                        | 0.00        | <b>14.04</b>   |
| <b>5</b>                                                 | 0.00                 | 0.63                        | 0.87                         | 1.65                        | 0.02                 | 0.00                        | 0.64                         | 1.46                        | 0.00        | <b>5.28</b>    |
| <b>6</b>                                                 | 0.00                 | 0.00                        | 0.45                         | 1.71                        | 0.03                 | 0.53                        | 0.66                         | 3.78                        | 0.00        | <b>7.15</b>    |
| <b>7</b>                                                 | 0.00                 | 0.00                        | 1.87                         | 2.36                        | 0.03                 | 0.55                        | 0.69                         | 5.49                        | 0.00        | <b>10.98</b>   |
| <b>8</b>                                                 | 0.00                 | 0.00                        | 0.48                         | 1.22                        | 0.03                 | 0.57                        | 0.71                         | 2.44                        | 0.00        | <b>5.45</b>    |

Table D1. Mean inpatient costs (Admittee Patient Care dataset from Hospital Episode Statistics) per person-quarter (2017-2018 £) - polyps unknown. DC = Day Case; EL = Elective Inpatient; CT = computed tomography; Int = intermediate

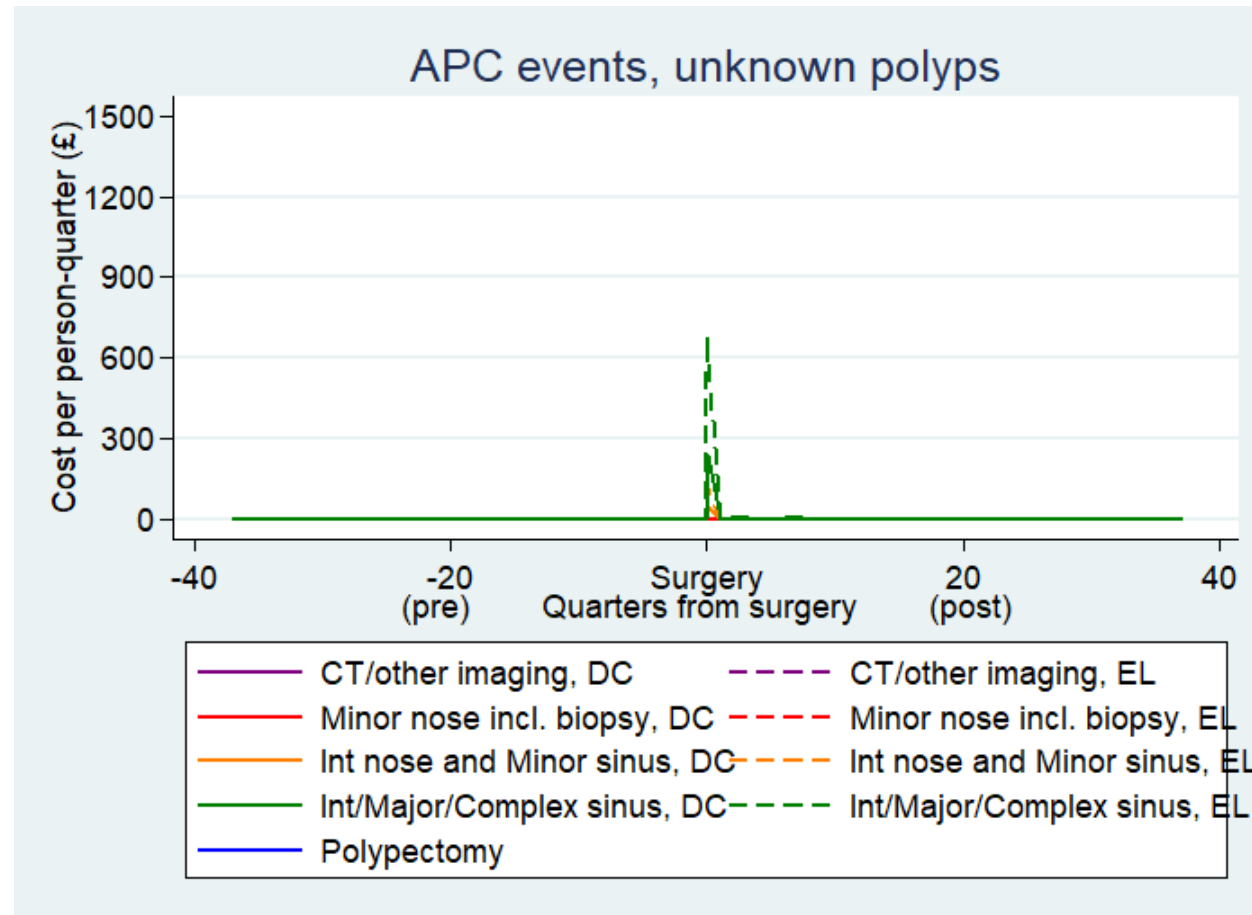

| Quarters after surgery (surgery date is at centre of Q0) | CT/other imaging, DC | Minor nose incl. biopsy, DC | Int nose and Minor sinus, DC | Int/Major/Complex sinus, DC | CT/other imaging, EL | Minor nose incl. biopsy, EL | Int nose and Minor sinus, EL | Int/Major/Complex sinus, EL | Polypectomy    | TOTAL          |
|----------------------------------------------------------|----------------------|-----------------------------|------------------------------|-----------------------------|----------------------|-----------------------------|------------------------------|-----------------------------|----------------|----------------|
| -8                                                       | 0.00                 | 0.00                        | 0.00                         | 0.30                        | 0.09                 | 0.00                        | 0.00                         | 0.00                        | 0.00           | <b>0.39</b>    |
| -7                                                       | 0.05                 | 0.00                        | 0.00                         | 0.29                        | 0.05                 | 0.27                        | 0.00                         | 1.15                        | 0.00           | <b>1.81</b>    |
| -6                                                       | 0.05                 | 0.00                        | 0.00                         | 0.00                        | 0.11                 | 0.26                        | 0.33                         | 0.00                        | 0.00           | <b>0.75</b>    |
| -5                                                       | 0.02                 | 0.15                        | 0.21                         | 0.00                        | 0.08                 | 0.00                        | 0.00                         | 0.36                        | 0.00           | <b>0.83</b>    |
| -4                                                       | 0.05                 | 0.45                        | 0.00                         | 0.26                        | 0.15                 | 0.49                        | 0.00                         | 0.34                        | 0.00           | <b>1.73</b>    |
| -3                                                       | 0.06                 | 0.00                        | 0.00                         | 0.00                        | 0.11                 | 0.47                        | 0.00                         | 0.33                        | 0.25           | <b>1.21</b>    |
| -2                                                       | 0.05                 | 0.00                        | 0.00                         | 0.00                        | 0.13                 | 0.90                        | 0.56                         | 0.32                        | 0.00           | <b>1.96</b>    |
| -1                                                       | 0.07                 | 0.13                        | 0.37                         | 0.23                        | 0.11                 | 1.30                        | 0.27                         | 0.61                        | 0.47           | <b>3.57</b>    |
| <b>0</b>                                                 | <b>0.02</b>          | <b>7.85</b>                 | <b>40.09</b>                 | <b>152.60</b>               | <b>0.14</b>          | <b>28.44</b>                | <b>166.57</b>                | <b>474.22</b>               | <b>1414.69</b> | <b>2284.63</b> |
| <b>1</b>                                                 | 0.00                 | 0.39                        | 0.72                         | 1.16                        | 0.02                 | 0.64                        | 1.06                         | 4.37                        | 4.13           | <b>12.49</b>   |
| <b>2</b>                                                 | 0.00                 | 0.13                        | 0.56                         | 3.34                        | 0.01                 | 0.22                        | 0.55                         | 3.85                        | 7.54           | <b>16.20</b>   |
| <b>3</b>                                                 | 0.01                 | 0.69                        | 0.96                         | 2.45                        | 0.02                 | 1.13                        | 1.97                         | 7.26                        | 11.16          | <b>25.63</b>   |
| <b>4</b>                                                 | 0.01                 | 0.28                        | 0.98                         | 2.76                        | 0.02                 | 0.46                        | 0.58                         | 6.09                        | 9.96           | <b>21.15</b>   |
| <b>5</b>                                                 | 0.00                 | 0.29                        | 0.61                         | 2.07                        | 0.01                 | 0.48                        | 2.97                         | 6.26                        | 13.58          | <b>26.26</b>   |
| <b>6</b>                                                 | 0.00                 | 0.15                        | 0.00                         | 2.39                        | 0.00                 | 0.49                        | 1.22                         | 5.01                        | 8.18           | <b>17.45</b>   |
| <b>7</b>                                                 | 0.00                 | 0.15                        | 0.85                         | 2.19                        | 0.01                 | 0.25                        | 1.26                         | 6.61                        | 12.20          | <b>23.53</b>   |
| <b>8</b>                                                 | 0.00                 | 0.16                        | 1.10                         | 2.53                        | 0.02                 | 0.26                        | 2.27                         | 4.54                        | 12.02          | <b>22.91</b>   |

**Table D2. Mean inpatient costs (Admittee Patient Care dataset from Hospital Episode Statistics) per person-quarter (2017-2018 £) - polyps positive. DC = Day Case; EL = Elective Inpatient; CT = computed tomography; Int = intermediate**

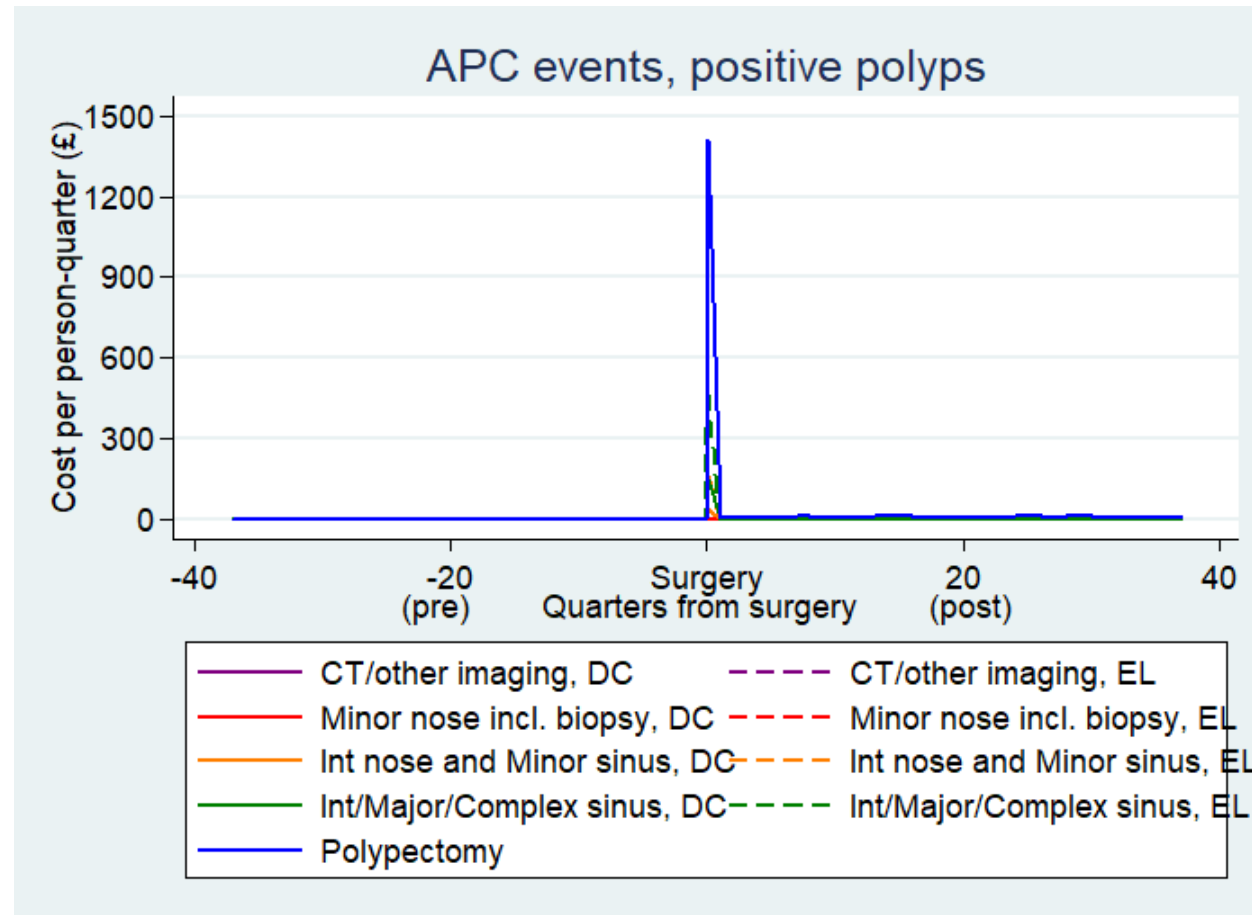

| Quarters after surgery (surgery date is at centre of Q0) | CT/other imaging, DC | Minor nose incl. biopsy, DC | Int nose and Minor sinus, DC | Int/Major/Complex sinus, DC | CT/other imaging, EL | Minor nose incl. biopsy, EL | Int nose and Minor sinus, EL | Int/Major/Complex sinus, EL | Polypectomy   | TOTAL          |
|----------------------------------------------------------|----------------------|-----------------------------|------------------------------|-----------------------------|----------------------|-----------------------------|------------------------------|-----------------------------|---------------|----------------|
| -8                                                       | 0.00                 | 0.12                        | 0.00                         | 0.40                        | 0.09                 | 0.19                        | 0.00                         | 0.00                        | 0.00          | <b>0.80</b>    |
| -7                                                       | 0.04                 | 0.00                        | 0.00                         | 0.19                        | 0.06                 | 0.18                        | 0.00                         | 1.28                        | 0.00          | <b>1.76</b>    |
| -6                                                       | 0.06                 | 0.00                        | 0.00                         | 0.00                        | 0.10                 | 0.18                        | 0.44                         | 0.00                        | 0.00          | <b>0.77</b>    |
| -5                                                       | 0.04                 | 0.21                        | 0.14                         | 0.36                        | 0.15                 | 0.68                        | 0.21                         | 0.72                        | 0.00          | <b>2.51</b>    |
| -4                                                       | 0.08                 | 0.30                        | 0.14                         | 0.35                        | 0.17                 | 0.49                        | 0.00                         | 0.46                        | 0.00          | <b>1.99</b>    |
| -3                                                       | 0.05                 | 0.00                        | 0.13                         | 0.00                        | 0.15                 | 0.63                        | 0.00                         | 0.44                        | 0.17          | <b>1.58</b>    |
| -2                                                       | 0.05                 | 0.09                        | 0.00                         | 0.32                        | 0.13                 | 0.76                        | 0.38                         | 1.28                        | 0.00          | <b>3.02</b>    |
| -1                                                       | 0.06                 | 0.36                        | 0.37                         | 0.31                        | 0.19                 | 1.17                        | 0.18                         | 1.65                        | 0.31          | <b>4.60</b>    |
| <b>0</b>                                                 | <b>0.07</b>          | <b>8.10</b>                 | <b>41.32</b>                 | <b>181.87</b>               | <b>0.37</b>          | <b>28.66</b>                | <b>148.42</b>                | <b>540.56</b>               | <b>952.62</b> | <b>1902.00</b> |
| <b>1</b>                                                 | 0.00                 | 0.26                        | 0.61                         | 1.88                        | 0.04                 | 0.72                        | 1.08                         | 4.82                        | 2.79          | <b>12.20</b>   |
| <b>2</b>                                                 | 0.00                 | 0.18                        | 0.76                         | 2.74                        | 0.01                 | 0.15                        | 0.37                         | 3.88                        | 5.11          | <b>13.20</b>   |
| <b>3</b>                                                 | 0.01                 | 0.56                        | 1.04                         | 2.16                        | 0.02                 | 0.76                        | 1.53                         | 6.23                        | 7.58          | <b>19.89</b>   |
| <b>4</b>                                                 | 0.01                 | 0.29                        | 0.80                         | 2.39                        | 0.02                 | 0.31                        | 0.98                         | 7.31                        | 6.78          | <b>18.89</b>   |
| <b>5</b>                                                 | 0.00                 | 0.40                        | 0.69                         | 1.94                        | 0.02                 | 0.32                        | 2.23                         | 4.71                        | 9.27          | <b>19.58</b>   |
| <b>6</b>                                                 | 0.00                 | 0.10                        | 0.14                         | 2.18                        | 0.01                 | 0.50                        | 1.05                         | 4.61                        | 5.59          | <b>14.18</b>   |
| <b>7</b>                                                 | 0.00                 | 0.11                        | 1.17                         | 2.24                        | 0.02                 | 0.35                        | 1.08                         | 6.25                        | 8.37          | <b>19.58</b>   |
| <b>8</b>                                                 | 0.00                 | 0.11                        | 0.91                         | 2.12                        | 0.03                 | 0.36                        | 1.78                         | 3.87                        | 8.26          | <b>17.43</b>   |

**Table D3. Mean inpatient costs (Admittee Patient Care dataset from Hospital Episode Statistics) per person-quarter (2017-2018 £) – all polyp statuses.**

DC = Day Case; EL = Elective Inpatient; CT = computed tomography; Int = intermediate

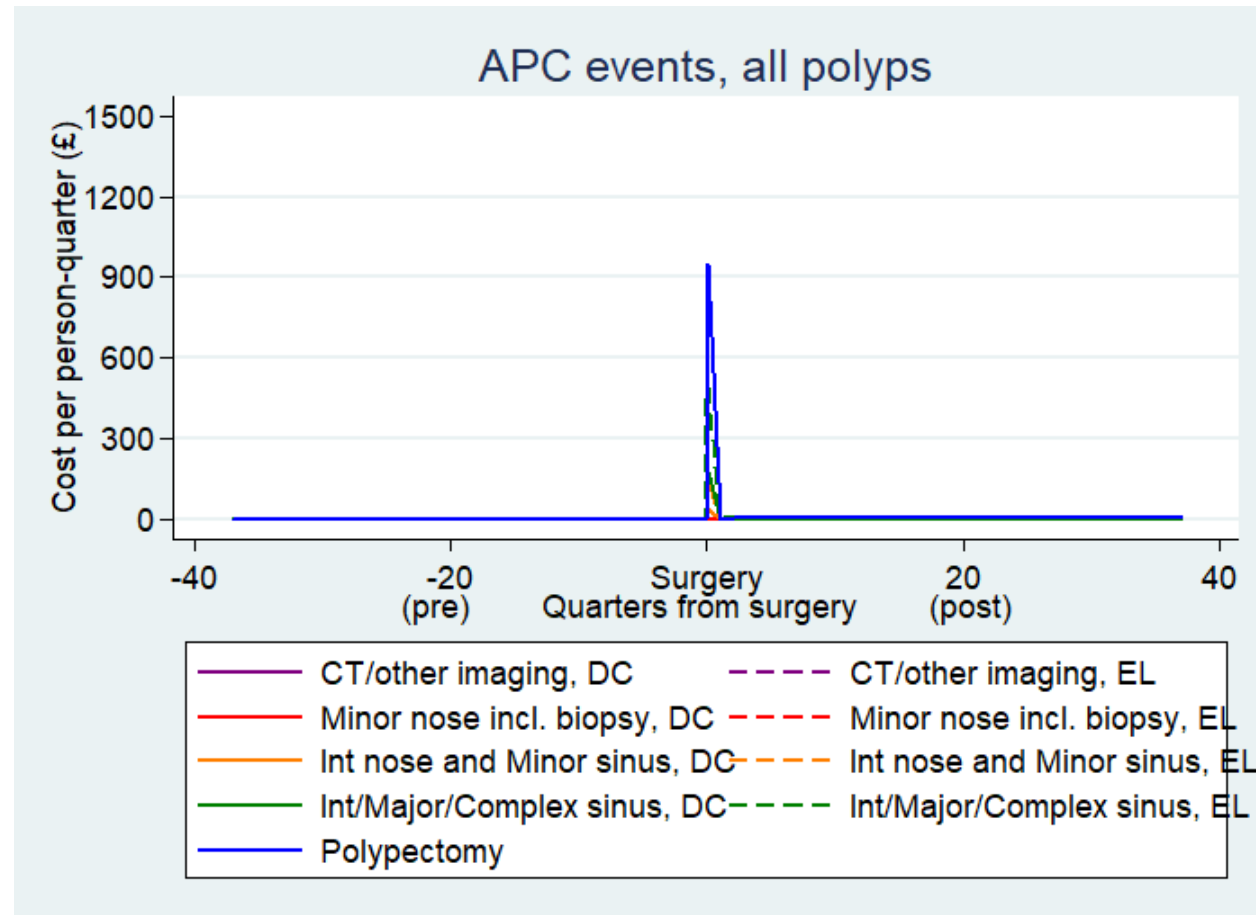

## E. Section E – Mean outpatient costs per person-quarter, centred on surgery date at midpoint of Q0

| Quarters after surgery (surgery date is at centre of Q0) | CT/other imaging | Minor nose incl. biopsy | Polypectomy | Int nose and Minor sinus | Int sinus    | Major/complex sinus | TOTAL        |
|----------------------------------------------------------|------------------|-------------------------|-------------|--------------------------|--------------|---------------------|--------------|
| -8                                                       | 8.52             | 0.80                    | 0.08        | 3.53                     | 3.79         | 2.98                | <b>19.69</b> |
| -7                                                       | 10.60            | 1.00                    | 0.03        | 3.84                     | 5.26         | 3.43                | <b>24.15</b> |
| -6                                                       | 8.69             | 1.14                    | 0.10        | 4.01                     | 5.15         | 1.65                | <b>20.74</b> |
| -5                                                       | 9.70             | 1.03                    | 0.05        | 4.66                     | 5.60         | 3.16                | <b>24.21</b> |
| -4                                                       | 10.23            | 0.99                    | 0.16        | 5.16                     | 6.85         | 1.51                | <b>24.90</b> |
| -3                                                       | 13.62            | 1.22                    | 0.18        | 6.06                     | 6.81         | 3.37                | <b>31.25</b> |
| -2                                                       | 16.24            | 1.64                    | 0.08        | 7.58                     | 8.27         | 1.84                | <b>35.67</b> |
| -1                                                       | 25.04            | 1.84                    | 0.44        | 11.36                    | 12.02        | 6.17                | <b>56.87</b> |
| <b>0</b>                                                 | <b>23.03</b>     | <b>2.93</b>             | <b>0.85</b> | <b>12.47</b>             | <b>14.46</b> | <b>8.66</b>         | <b>62.41</b> |
| 1                                                        | 14.88            | 1.63                    | 0.32        | 7.57                     | 8.64         | 2.97                | <b>36.00</b> |
| 2                                                        | 12.05            | 1.86                    | 0.12        | 6.30                     | 6.76         | 2.04                | <b>29.12</b> |
| 3                                                        | 9.76             | 1.53                    | 0.17        | 6.18                     | 5.75         | 2.09                | <b>25.48</b> |
| 4                                                        | 9.36             | 1.18                    | 0.18        | 5.40                     | 5.83         | 2.51                | <b>24.46</b> |
| 5                                                        | 9.66             | 0.97                    | 0.15        | 4.94                     | 5.13         | 2.58                | <b>23.43</b> |
| 6                                                        | 9.66             | 1.18                    | 0.12        | 4.56                     | 5.95         | 3.04                | <b>24.50</b> |
| 7                                                        | 8.91             | 1.23                    | 0.27        | 3.90                     | 5.41         | 1.56                | <b>21.28</b> |
| 8                                                        | 8.76             | 1.12                    | 0.13        | 3.86                     | 5.01         | 1.61                | <b>20.49</b> |

Table E1. Mean outpatient costs (Outpatient Care dataset from Hospital Episode Statistics) per person-quarter (£) - polyps positive.

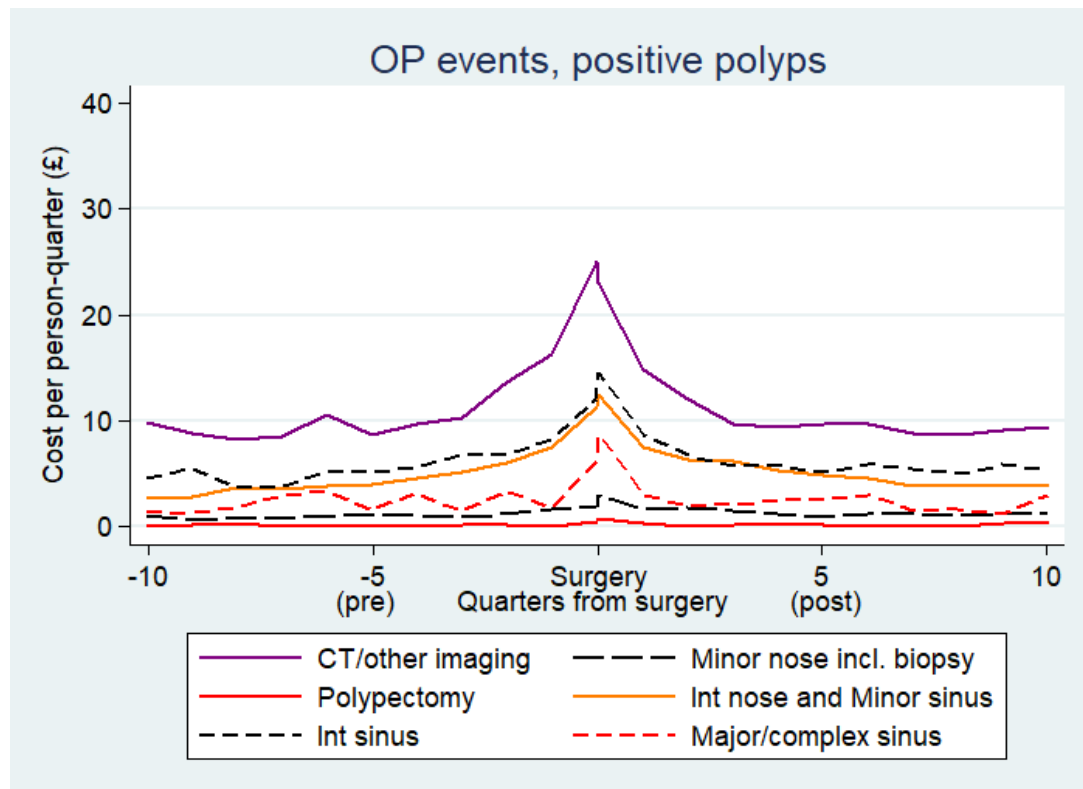

| Quarters after surgery (surgery date is at centre of Q0) | CT/other imaging | Minor nose incl. biopsy | Polypectomy | Int nose and Minor sinus | Int sinus    | Major/complex sinus | TOTAL        |
|----------------------------------------------------------|------------------|-------------------------|-------------|--------------------------|--------------|---------------------|--------------|
| -8                                                       | 13.55            | 2.39                    | -           | 5.19                     | 7.41         | 1.13                | <b>29.67</b> |
| -7                                                       | 15.59            | 3.31                    | -           | 4.24                     | 7.94         | 0.00                | <b>31.07</b> |
| -6                                                       | 16.30            | 2.64                    | -           | 5.10                     | 7.48         | 1.04                | <b>32.57</b> |
| -5                                                       | 16.35            | 2.34                    | -           | 5.21                     | 7.07         | 0.00                | <b>30.97</b> |
| -4                                                       | 19.16            | 2.26                    | -           | 5.80                     | 9.08         | 5.83                | <b>42.14</b> |
| -3                                                       | 20.40            | 2.40                    | -           | 7.48                     | 9.41         | 3.72                | <b>43.42</b> |
| -2                                                       | 25.25            | 2.51                    | -           | 9.04                     | 11.10        | 0.90                | <b>48.79</b> |
| -1                                                       | 32.30            | 4.55                    | -           | 11.26                    | 14.70        | 5.18                | <b>67.99</b> |
| 0                                                        | <b>29.11</b>     | <b>4.37</b>             | -           | <b>13.95</b>             | <b>17.65</b> | <b>10.59</b>        | <b>75.68</b> |
| 1                                                        | 25.51            | 3.16                    | -           | 12.17                    | 12.35        | 5.51                | <b>58.70</b> |
| 2                                                        | 17.85            | 2.54                    | -           | 9.62                     | 9.16         | 1.43                | <b>40.59</b> |
| 3                                                        | 15.27            | 2.41                    | -           | 7.26                     | 8.76         | 2.22                | <b>35.91</b> |
| 4                                                        | 15.19            | 1.93                    | -           | 6.57                     | 7.83         | 2.29                | <b>33.81</b> |
| 5                                                        | 15.00            | 2.01                    | -           | 6.24                     | 7.46         | 1.59                | <b>32.30</b> |
| 6                                                        | 13.02            | 1.57                    | -           | 6.59                     | 6.54         | 4.92                | <b>32.65</b> |
| 7                                                        | 14.07            | 1.32                    | -           | 5.68                     | 5.89         | 9.38                | <b>36.33</b> |
| 8                                                        | 15.98            | 1.28                    | -           | 5.63                     | 5.87         | 2.65                | <b>31.40</b> |

Table E2. Mean outpatient costs (Outpatient Care dataset from Hospital Episode Statistics) per person-quarter (£) - polyps unknown.

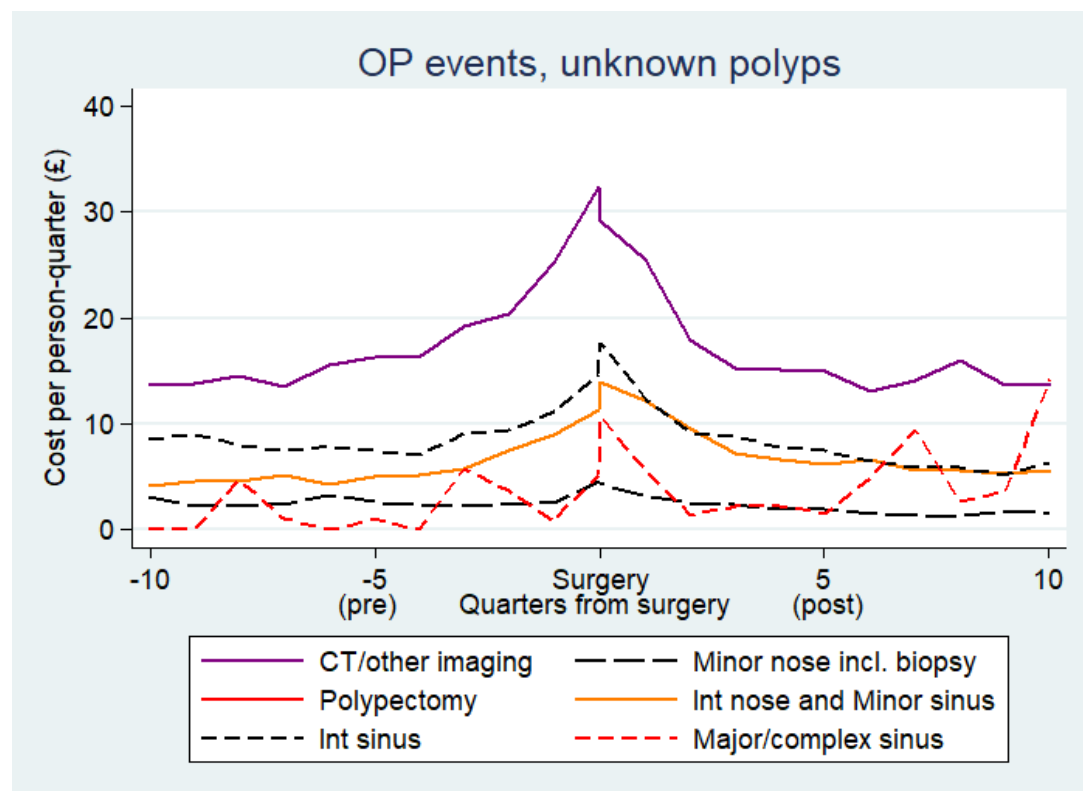



| Quarters after surgery (surgery date is at centre of Q0) | CT/other imaging | Minor nose incl. biopsy | Polypectomy | Int nose and Minor sinus | Int sinus    | Major/complex sinus | TOTAL        |
|----------------------------------------------------------|------------------|-------------------------|-------------|--------------------------|--------------|---------------------|--------------|
| -8                                                       | 10.25            | 1.35                    | 0.05        | 4.10                     | 5.04         | 2.34                | <b>23.14</b> |
| -7                                                       | 12.32            | 1.80                    | 0.02        | 3.98                     | 6.18         | 2.25                | <b>26.53</b> |
| -6                                                       | 11.32            | 1.66                    | 0.07        | 4.39                     | 5.95         | 1.44                | <b>24.82</b> |
| -5                                                       | 11.98            | 1.48                    | 0.03        | 4.85                     | 6.10         | 2.08                | <b>26.53</b> |
| -4                                                       | 13.28            | 1.42                    | 0.11        | 5.38                     | 7.61         | 2.99                | <b>30.78</b> |
| -3                                                       | 15.93            | 1.62                    | 0.12        | 6.54                     | 7.70         | 3.49                | <b>35.40</b> |
| -2                                                       | 19.29            | 1.94                    | 0.06        | 8.07                     | 9.23         | 1.52                | <b>40.11</b> |
| -1                                                       | 27.49            | 2.76                    | 0.29        | 11.33                    | 12.93        | 5.83                | <b>60.62</b> |
| 0                                                        | <b>25.01</b>     | <b>3.40</b>             | <b>0.57</b> | <b>12.96</b>             | <b>15.51</b> | <b>9.29</b>         | <b>66.75</b> |
| 1                                                        | 18.32            | 2.13                    | 0.21        | 9.06                     | 9.84         | 3.79                | <b>43.35</b> |
| 2                                                        | 13.92            | 2.08                    | 0.08        | 7.37                     | 7.53         | 1.84                | <b>32.82</b> |
| 3                                                        | 11.52            | 1.81                    | 0.12        | 6.52                     | 6.71         | 2.13                | <b>28.82</b> |
| 4                                                        | 11.22            | 1.42                    | 0.12        | 5.77                     | 6.47         | 2.44                | <b>27.45</b> |
| 5                                                        | 11.35            | 1.30                    | 0.10        | 5.35                     | 5.87         | 2.27                | <b>26.24</b> |
| 6                                                        | 10.72            | 1.30                    | 0.08        | 5.21                     | 6.14         | 3.63                | <b>27.08</b> |
| 7                                                        | 10.53            | 1.26                    | 0.18        | 4.46                     | 5.56         | 4.01                | <b>26.00</b> |
| 8                                                        | 11.02            | 1.17                    | 0.09        | 4.41                     | 5.28         | 1.93                | <b>23.91</b> |

Table E3. Mean outpatient costs (Outpatient Care dataset from Hospital Episode Statistics) per person-quarter (£) – all patients.

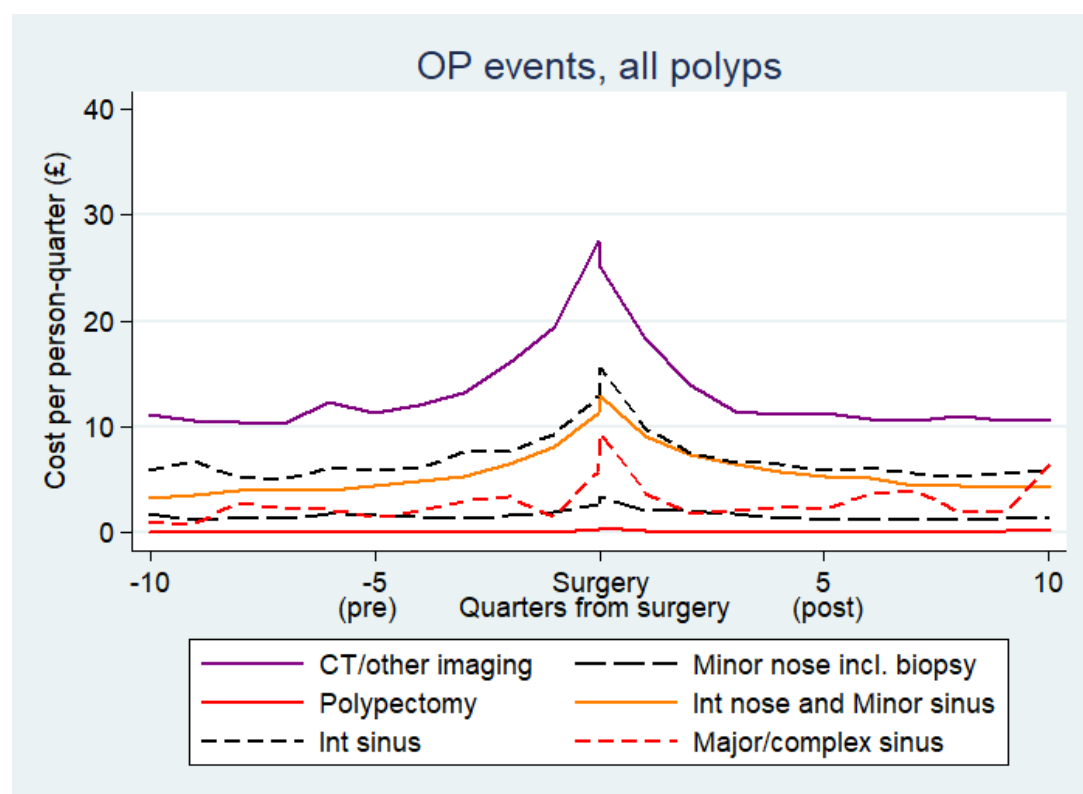

## F. Section F – Mean primary care consultation costs per person-quarter, centred on surgery date at midpoint of Q0

| Quarters after surgery (surgery date is at centre of Q0) | GP consultation | GP home visit | GP telephone | Nurse consultation | Nurse home visit | Nurse telephone | TOTAL        |
|----------------------------------------------------------|-----------------|---------------|--------------|--------------------|------------------|-----------------|--------------|
| -8                                                       | 7.98            | 0.03          | 0.09         | 0.09               | 0.01             | 0.00            | <b>8.20</b>  |
| -7                                                       | 8.88            | 0.04          | 0.10         | 0.09               | 0.01             | 0.00            | <b>9.12</b>  |
| -6                                                       | 10.45           | 0.06          | 0.17         | 0.13               | 0.00             | 0.00            | <b>10.82</b> |
| -5                                                       | 12.93           | 0.04          | 0.19         | 0.15               | 0.01             | 0.01            | <b>13.31</b> |
| -4                                                       | 16.95           | 0.06          | 0.21         | 0.17               | 0.01             | 0.01            | <b>17.41</b> |
| -3                                                       | 22.30           | 0.11          | 0.27         | 0.26               | 0.01             | 0.01            | <b>22.96</b> |
| -2                                                       | 27.36           | 0.11          | 0.39         | 0.33               | 0.02             | 0.01            | <b>28.23</b> |
| -1                                                       | 22.53           | 0.10          | 0.44         | 0.33               | 0.03             | 0.01            | <b>23.43</b> |
| 0                                                        | <b>5.36</b>     | <b>0.01</b>   | <b>0.12</b>  | <b>0.09</b>        | <b>0.01</b>      | <b>0.00</b>     | <b>5.59</b>  |
| 1                                                        | 4.63            | 0.02          | 0.11         | 0.07               | 0.00             | 0.01            | <b>4.85</b>  |
| 2                                                        | 4.83            | 0.05          | 0.13         | 0.06               | 0.01             | 0.00            | <b>5.09</b>  |
| 3                                                        | 4.47            | 0.01          | 0.09         | 0.07               | 0.01             | 0.00            | <b>4.65</b>  |
| 4                                                        | 4.43            | 0.05          | 0.11         | 0.07               | 0.01             | 0.00            | <b>4.67</b>  |
| 5                                                        | 4.45            | 0.02          | 0.13         | 0.11               | 0.01             | 0.00            | <b>4.72</b>  |
| 6                                                        | 4.36            | 0.04          | 0.14         | 0.07               | 0.01             | 0.01            | <b>4.62</b>  |
| 7                                                        | 4.32            | 0.03          | 0.13         | 0.06               | 0.00             | 0.00            | <b>4.55</b>  |
| 8                                                        | 4.51            | 0.01          | 0.14         | 0.06               | 0.01             | 0.00            | <b>4.72</b>  |

Table F1. Mean primary care consultation costs (CPRD dataset) per person-quarter (£) - polyps positive.

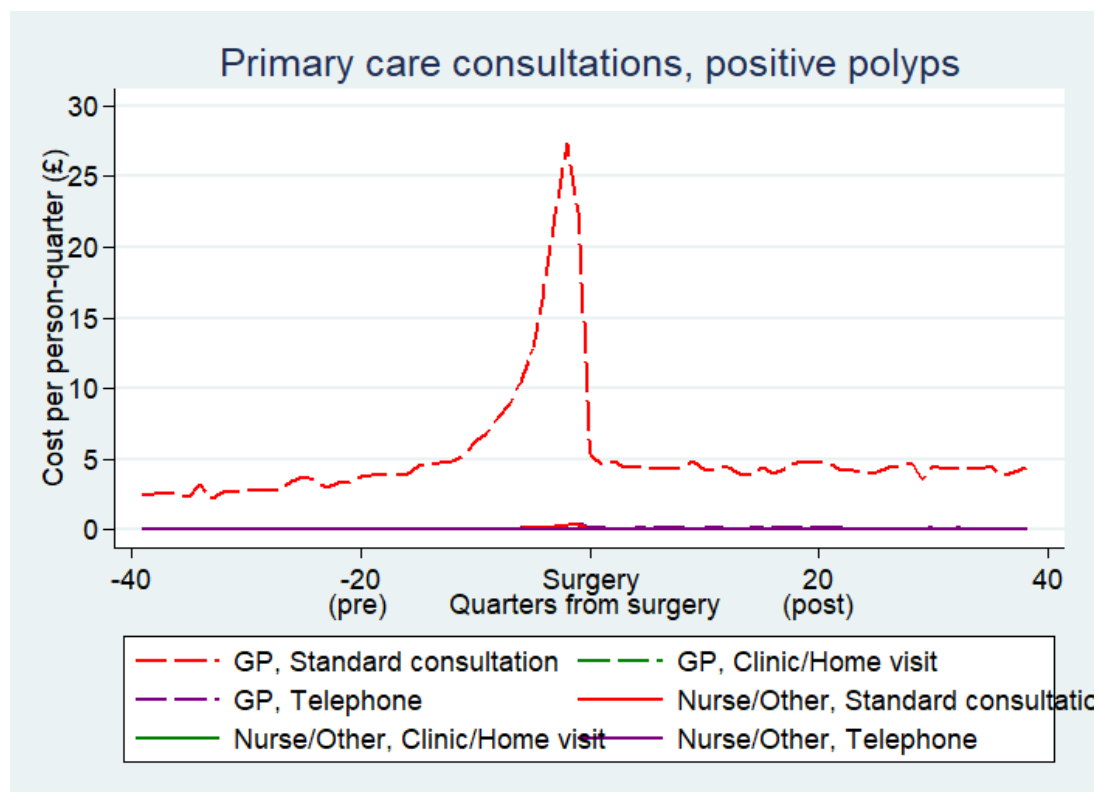

| Quarters after surgery (surgery date is at centre of Q0) | GP consultation | GP home visit | GP telephone | Nurse consultation | Nurse home visit | Nurse telephone | TOTAL        |
|----------------------------------------------------------|-----------------|---------------|--------------|--------------------|------------------|-----------------|--------------|
| -8                                                       | 8.43            | 0.02          | 0.11         | 0.10               | 0.01             | 0.00            | <b>8.68</b>  |
| -7                                                       | 9.64            | 0.02          | 0.14         | 0.13               | 0.01             | 0.00            | <b>9.95</b>  |
| -6                                                       | 12.32           | 0.03          | 0.22         | 0.13               | 0.01             | 0.01            | <b>12.72</b> |
| -5                                                       | 14.46           | 0.03          | 0.24         | 0.14               | 0.01             | 0.00            | <b>14.89</b> |
| -4                                                       | 19.41           | 0.06          | 0.31         | 0.22               | 0.02             | 0.01            | <b>20.04</b> |
| -3                                                       | 21.60           | 0.08          | 0.51         | 0.28               | 0.02             | 0.01            | <b>22.50</b> |
| -2                                                       | 21.82           | 0.07          | 0.50         | 0.33               | 0.02             | 0.01            | <b>22.76</b> |
| -1                                                       | 16.23           | 0.08          | 0.52         | 0.25               | 0.01             | 0.01            | <b>17.11</b> |
| 0                                                        | <b>6.69</b>     | <b>0.01</b>   | <b>0.22</b>  | <b>0.11</b>        | <b>0.01</b>      | <b>0.00</b>     | <b>7.04</b>  |
| 1                                                        | 6.77            | 0.00          | 0.22         | 0.12               | 0.01             | 0.01            | <b>7.13</b>  |
| 2                                                        | 6.74            | 0.02          | 0.09         | 0.07               | 0.01             | 0.01            | <b>6.94</b>  |
| 3                                                        | 5.47            | 0.02          | 0.08         | 0.08               | 0.00             | 0.00            | <b>5.66</b>  |
| 4                                                        | 6.57            | 0.02          | 0.15         | 0.07               | 0.00             | 0.00            | <b>6.82</b>  |
| 5                                                        | 6.38            | 0.05          | 0.12         | 0.07               | 0.01             | 0.00            | <b>6.63</b>  |
| 6                                                        | 5.03            | 0.03          | 0.16         | 0.07               | 0.01             | 0.00            | <b>5.31</b>  |
| 7                                                        | 5.85            | 0.02          | 0.17         | 0.05               | 0.00             | 0.00            | <b>6.10</b>  |
| 8                                                        | 6.56            | 0.02          | 0.17         | 0.12               | 0.00             | 0.00            | <b>6.88</b>  |

Table F2. Mean primary care consultation costs (CPRD dataset) per person-quarter (£) - polyps unknown.

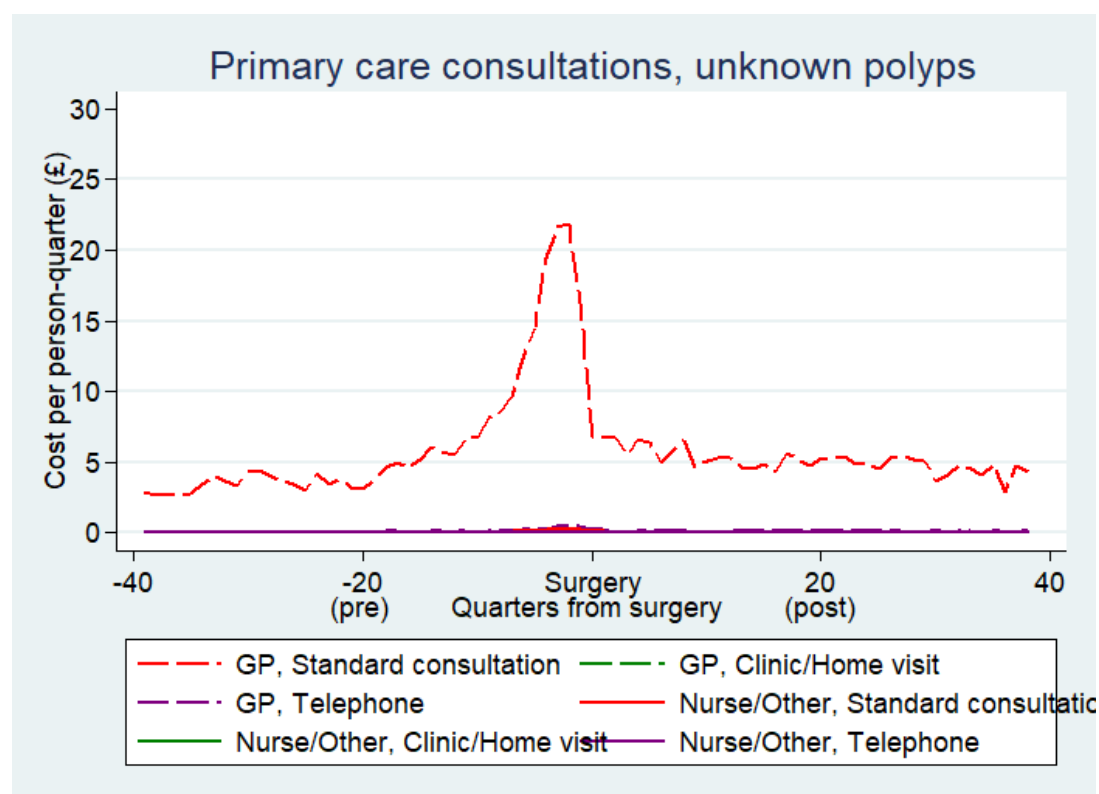

| Quarters after surgery (surgery date is at centre of Q0) | GP consultation | GP home visit | GP telephone | Nurse consultation | Nurse home visit | Nurse telephone | TOTAL        |
|----------------------------------------------------------|-----------------|---------------|--------------|--------------------|------------------|-----------------|--------------|
| -8                                                       | 8.13            | 0.03          | 0.10         | 0.09               | 0.01             | 0.00            | <b>8.36</b>  |
| -7                                                       | 9.13            | 0.03          | 0.11         | 0.10               | 0.01             | 0.00            | <b>9.39</b>  |
| -6                                                       | 11.06           | 0.05          | 0.19         | 0.13               | 0.01             | 0.00            | <b>11.45</b> |
| -5                                                       | 13.43           | 0.03          | 0.20         | 0.15               | 0.01             | 0.01            | <b>13.83</b> |
| -4                                                       | 17.75           | 0.06          | 0.25         | 0.19               | 0.01             | 0.01            | <b>18.27</b> |
| -3                                                       | 22.07           | 0.10          | 0.35         | 0.27               | 0.02             | 0.01            | <b>22.81</b> |
| -2                                                       | 25.56           | 0.10          | 0.42         | 0.33               | 0.02             | 0.01            | <b>26.44</b> |
| -1                                                       | 20.47           | 0.09          | 0.46         | 0.31               | 0.02             | 0.01            | <b>21.37</b> |
| 0                                                        | <b>5.79</b>     | <b>0.01</b>   | <b>0.15</b>  | <b>0.10</b>        | <b>0.01</b>      | <b>0.00</b>     | <b>6.06</b>  |
| 1                                                        | 5.32            | 0.01          | 0.15         | 0.09               | 0.01             | 0.01            | <b>5.58</b>  |
| 2                                                        | 5.44            | 0.04          | 0.12         | 0.07               | 0.01             | 0.00            | <b>5.68</b>  |
| 3                                                        | 4.79            | 0.02          | 0.09         | 0.07               | 0.01             | 0.00            | <b>4.97</b>  |
| 4                                                        | 5.11            | 0.04          | 0.12         | 0.07               | 0.00             | 0.00            | <b>5.35</b>  |
| 5                                                        | 5.06            | 0.03          | 0.13         | 0.10               | 0.01             | 0.00            | <b>5.32</b>  |
| 6                                                        | 4.57            | 0.03          | 0.14         | 0.07               | 0.01             | 0.01            | <b>4.84</b>  |
| 7                                                        | 4.80            | 0.03          | 0.14         | 0.06               | 0.00             | 0.00            | <b>5.04</b>  |
| 8                                                        | 5.15            | 0.01          | 0.15         | 0.07               | 0.01             | 0.00            | <b>5.40</b>  |

Table F3. Mean primary care consultation costs (CPRD dataset) per person-quarter (£) – all patients.

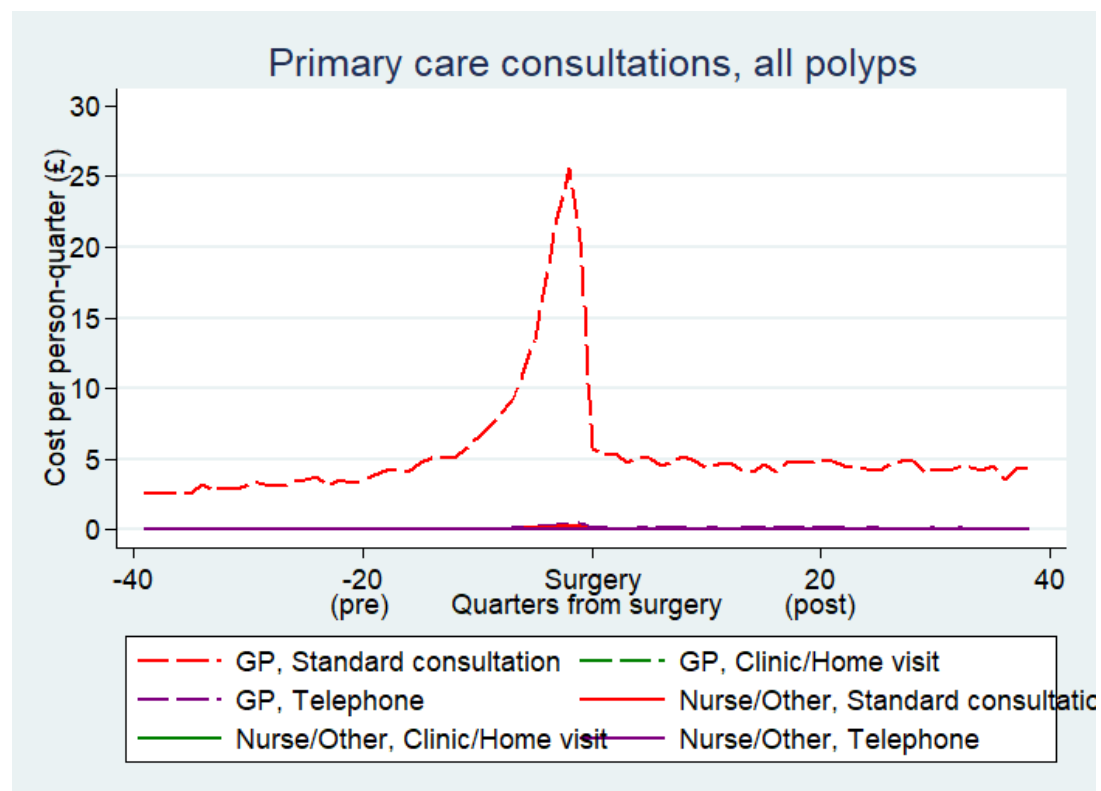

## G. Section G – Mean primary care antibiotic prescription costs per person-quarter, centred on surgery date at midpoint of Q0

| Quarters after surgery (surgery date at centre of Q0) | Cephalosporin | Macrolides  | Metro-nidazole | Penicillin  | Quinolone   | Tetra-cycline | Other       | TOTAL       |
|-------------------------------------------------------|---------------|-------------|----------------|-------------|-------------|---------------|-------------|-------------|
| -8                                                    | 0.07          | 0.26        | 0.01           | 0.18        | 0.02        | 0.30          | 0.03        | <b>0.87</b> |
| -7                                                    | 0.08          | 0.28        | 0.01           | 0.18        | 0.03        | 0.34          | 0.04        | <b>0.97</b> |
| -6                                                    | 0.08          | 0.27        | 0.01           | 0.20        | 0.02        | 0.36          | 0.03        | <b>0.98</b> |
| -5                                                    | 0.09          | 0.29        | 0.01           | 0.21        | 0.02        | 0.42          | 0.04        | <b>1.08</b> |
| -4                                                    | 0.09          | 0.33        | 0.01           | 0.22        | 0.03        | 0.44          | 0.04        | <b>1.15</b> |
| -3                                                    | 0.09          | 0.39        | 0.01           | 0.24        | 0.03        | 0.57          | 0.05        | <b>1.37</b> |
| -2                                                    | 0.10          | 0.41        | 0.01           | 0.25        | 0.03        | 0.63          | 0.04        | <b>1.46</b> |
| -1                                                    | 0.07          | 0.41        | 0.01           | 0.24        | 0.03        | 0.51          | 0.04        | <b>1.32</b> |
| 0                                                     | <b>0.09</b>   | <b>0.31</b> | <b>0.01</b>    | <b>0.21</b> | <b>0.03</b> | <b>0.31</b>   | <b>0.04</b> | <b>0.99</b> |
| 1                                                     | 0.07          | 0.29        | 0.01           | 0.19        | 0.03        | 0.28          | 0.04        | <b>0.92</b> |
| 2                                                     | 0.07          | 0.29        | 0.01           | 0.20        | 0.03        | 0.30          | 0.04        | <b>0.93</b> |
| 3                                                     | 0.08          | 0.26        | 0.01           | 0.20        | 0.03        | 0.32          | 0.04        | <b>0.95</b> |
| 4                                                     | 0.08          | 0.30        | 0.01           | 0.19        | 0.03        | 0.32          | 0.05        | <b>0.97</b> |
| 5                                                     | 0.07          | 0.25        | 0.01           | 0.20        | 0.03        | 0.33          | 0.04        | <b>0.93</b> |
| 6                                                     | 0.09          | 0.29        | 0.01           | 0.20        | 0.03        | 0.31          | 0.05        | <b>0.97</b> |
| 7                                                     | 0.08          | 0.30        | 0.01           | 0.19        | 0.03        | 0.30          | 0.04        | <b>0.94</b> |
| 8                                                     | 0.08          | 0.28        | 0.01           | 0.20        | 0.03        | 0.35          | 0.04        | <b>0.99</b> |

Table G1. Mean primary care antibiotic prescription costs (CPRD dataset) per person-quarter (£) - polyps positive.

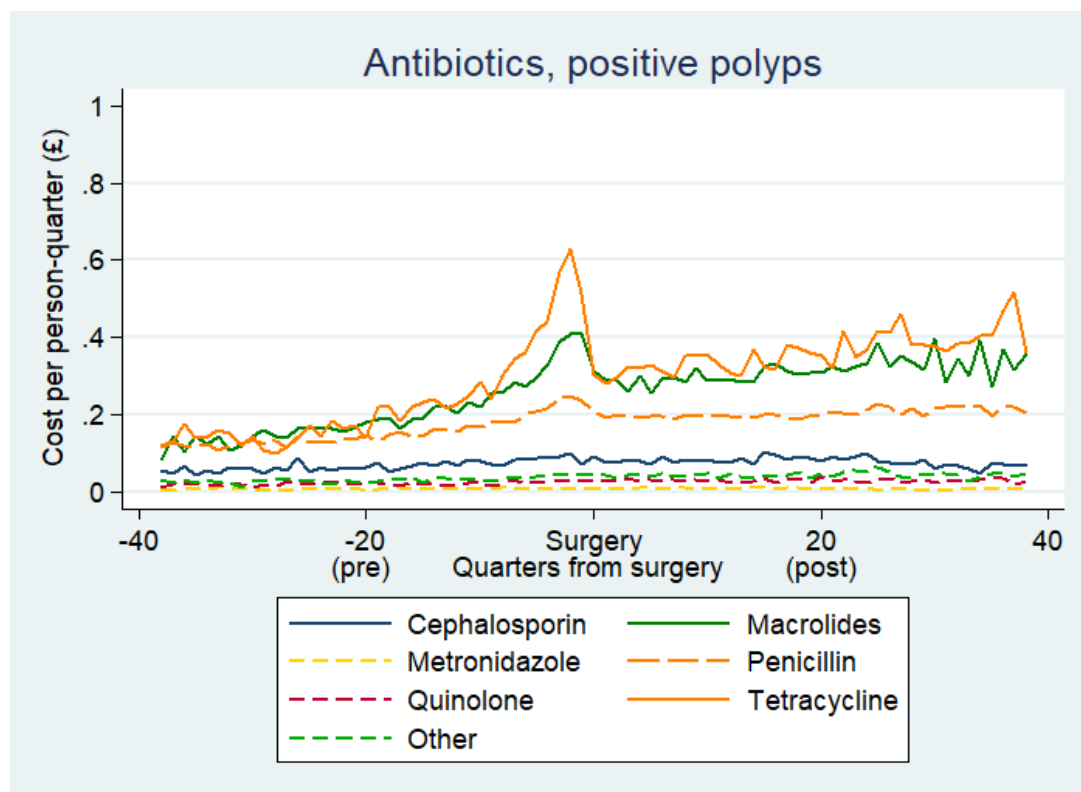

| Quarters after surgery (surgery date at centre of Q0) | Cephalosporin | Macrolides  | Metro-nidazole | Penicillin  | Quinolone   | Tetra-cycline | Other       | TOTAL       |
|-------------------------------------------------------|---------------|-------------|----------------|-------------|-------------|---------------|-------------|-------------|
| -8                                                    | 0.11          | 0.29        | 0.02           | 0.19        | 0.02        | 0.52          | 0.06        | <b>1.21</b> |
| -7                                                    | 0.11          | 0.32        | 0.01           | 0.22        | 0.02        | 0.52          | 0.04        | <b>1.24</b> |
| -6                                                    | 0.11          | 0.43        | 0.01           | 0.23        | 0.03        | 0.64          | 0.03        | <b>1.49</b> |
| -5                                                    | 0.15          | 0.42        | 0.01           | 0.28        | 0.03        | 0.65          | 0.05        | <b>1.59</b> |
| -4                                                    | 0.14          | 0.52        | 0.01           | 0.29        | 0.04        | 0.90          | 0.05        | <b>1.96</b> |
| -3                                                    | 0.13          | 0.62        | 0.02           | 0.30        | 0.04        | 0.98          | 0.04        | <b>2.15</b> |
| -2                                                    | 0.13          | 0.60        | 0.02           | 0.29        | 0.04        | 0.98          | 0.05        | <b>2.11</b> |
| -1                                                    | 0.13          | 0.54        | 0.01           | 0.27        | 0.03        | 0.77          | 0.05        | <b>1.82</b> |
| 0                                                     | <b>0.13</b>   | <b>0.37</b> | <b>0.01</b>    | <b>0.21</b> | <b>0.04</b> | <b>0.45</b>   | <b>0.05</b> | <b>1.27</b> |
| 1                                                     | 0.11          | 0.35        | 0.01           | 0.22        | 0.04        | 0.50          | 0.05        | <b>1.29</b> |
| 2                                                     | 0.10          | 0.36        | 0.02           | 0.20        | 0.04        | 0.50          | 0.05        | <b>1.26</b> |
| 3                                                     | 0.10          | 0.32        | 0.01           | 0.19        | 0.03        | 0.48          | 0.04        | <b>1.17</b> |
| 4                                                     | 0.10          | 0.35        | 0.01           | 0.21        | 0.03        | 0.54          | 0.06        | <b>1.30</b> |
| 5                                                     | 0.10          | 0.38        | 0.01           | 0.20        | 0.03        | 0.47          | 0.05        | <b>1.24</b> |
| 6                                                     | 0.08          | 0.39        | 0.01           | 0.18        | 0.03        | 0.48          | 0.05        | <b>1.23</b> |
| 7                                                     | 0.09          | 0.36        | 0.01           | 0.20        | 0.03        | 0.51          | 0.06        | <b>1.26</b> |
| 8                                                     | 0.10          | 0.40        | 0.02           | 0.19        | 0.03        | 0.52          | 0.05        | <b>1.30</b> |

Table G2. Mean primary care antibiotic prescription costs (CPRD dataset) per person-quarter (£) - polyps unknown.

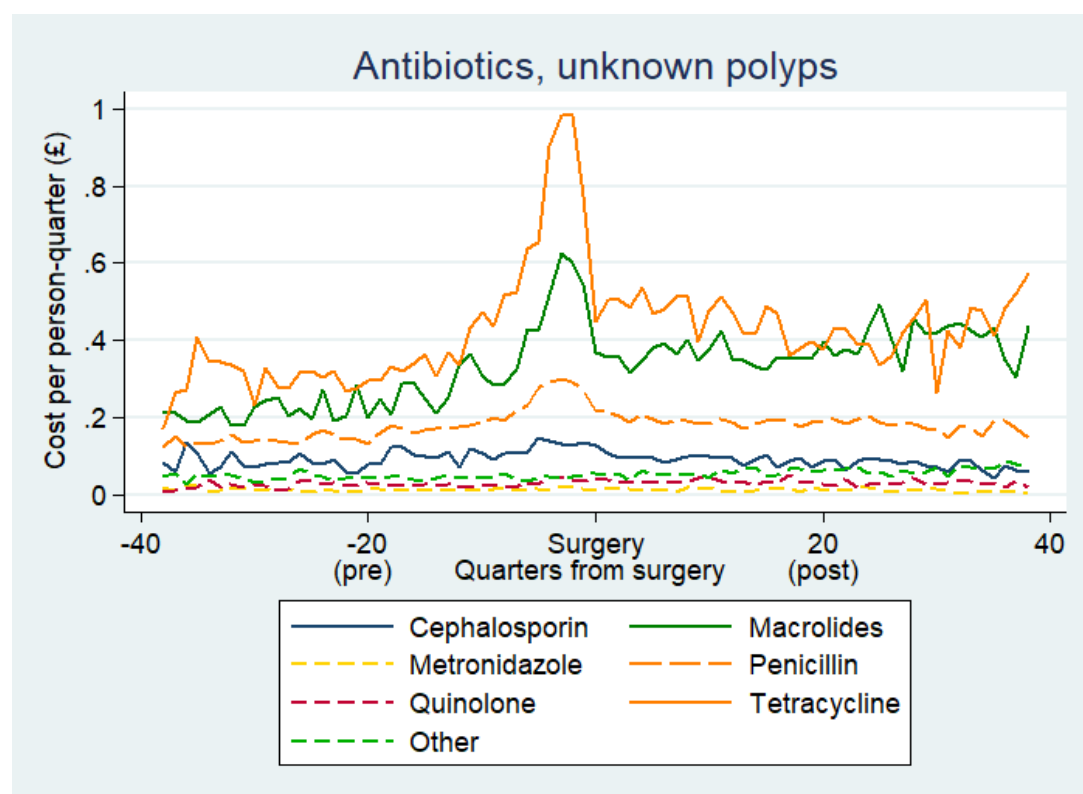

| Quarters after surgery (surgery date at centre of Q0) | Cephalosporin | Macrolides  | Metro-nidazole | Penicillin  | Quinolone   | Tetra-cycline | Other       | TOTAL       |
|-------------------------------------------------------|---------------|-------------|----------------|-------------|-------------|---------------|-------------|-------------|
| -8                                                    | 0.08          | 0.27        | 0.01           | 0.19        | 0.02        | 0.37          | 0.04        | <b>0.98</b> |
| -7                                                    | 0.09          | 0.30        | 0.01           | 0.19        | 0.03        | 0.40          | 0.04        | <b>1.06</b> |
| -6                                                    | 0.09          | 0.32        | 0.01           | 0.21        | 0.03        | 0.45          | 0.03        | <b>1.15</b> |
| -5                                                    | 0.11          | 0.34        | 0.01           | 0.23        | 0.02        | 0.50          | 0.04        | <b>1.25</b> |
| -4                                                    | 0.11          | 0.39        | 0.01           | 0.24        | 0.03        | 0.59          | 0.04        | <b>1.41</b> |
| -3                                                    | 0.10          | 0.47        | 0.01           | 0.26        | 0.03        | 0.71          | 0.04        | <b>1.62</b> |
| -2                                                    | 0.11          | 0.47        | 0.01           | 0.26        | 0.03        | 0.74          | 0.05        | <b>1.68</b> |
| -1                                                    | 0.09          | 0.46        | 0.01           | 0.25        | 0.03        | 0.60          | 0.05        | <b>1.48</b> |
| 0                                                     | <b>0.10</b>   | <b>0.33</b> | <b>0.01</b>    | <b>0.21</b> | <b>0.03</b> | <b>0.35</b>   | <b>0.05</b> | <b>1.08</b> |
| 1                                                     | 0.08          | 0.31        | 0.01           | 0.20        | 0.03        | 0.35          | 0.05        | <b>1.04</b> |
| 2                                                     | 0.08          | 0.31        | 0.01           | 0.20        | 0.03        | 0.36          | 0.04        | <b>1.04</b> |
| 3                                                     | 0.09          | 0.28        | 0.01           | 0.19        | 0.03        | 0.37          | 0.04        | <b>1.02</b> |
| 4                                                     | 0.08          | 0.32        | 0.01           | 0.20        | 0.03        | 0.39          | 0.05        | <b>1.08</b> |
| 5                                                     | 0.08          | 0.29        | 0.01           | 0.20        | 0.03        | 0.37          | 0.04        | <b>1.03</b> |
| 6                                                     | 0.09          | 0.32        | 0.01           | 0.19        | 0.03        | 0.37          | 0.05        | <b>1.05</b> |
| 7                                                     | 0.08          | 0.32        | 0.01           | 0.19        | 0.03        | 0.37          | 0.04        | <b>1.04</b> |
| 8                                                     | 0.09          | 0.32        | 0.01           | 0.20        | 0.03        | 0.40          | 0.04        | <b>1.09</b> |

Table G3. Mean primary care antibiotic prescription costs (CPRD dataset) per person-quarter (£) – all patients.

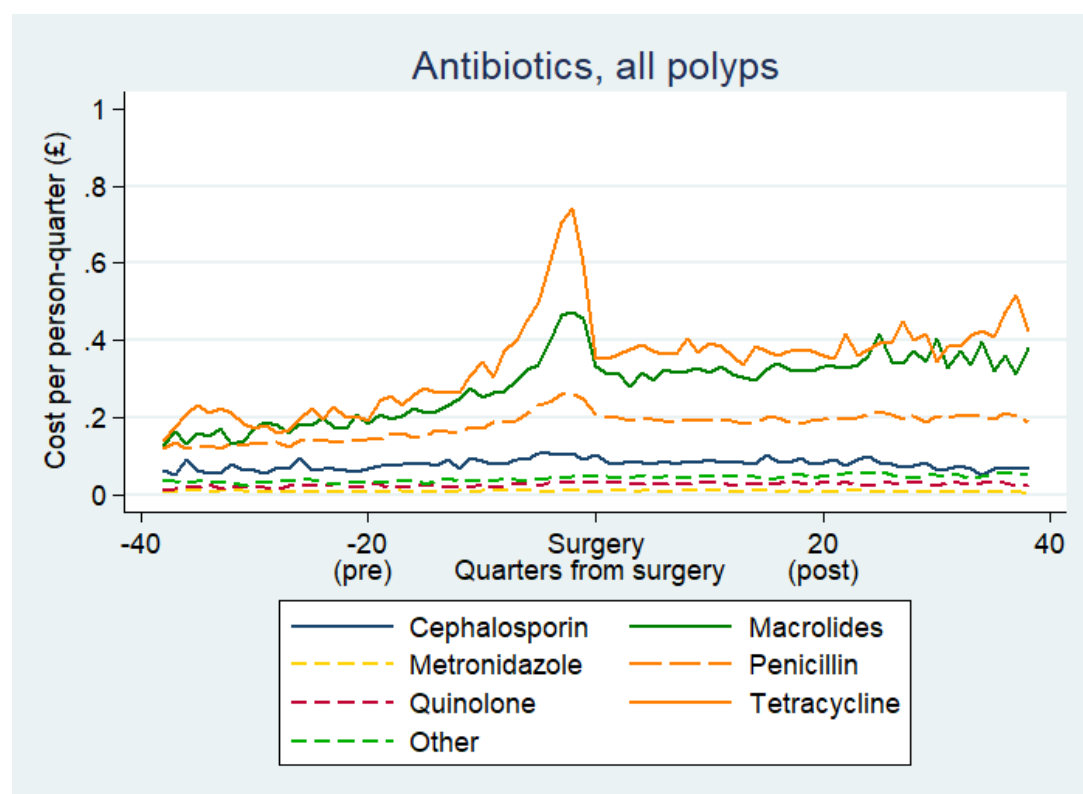

## H. Section H – Mean primary care non-antibiotic prescription costs per-person-quarter, centred on surgery date at midpoint of Q0

| Quarters after surgery<br>(surgery date at centre of<br>Q0) | Steroids | All other non-<br>abx meds | TOTAL |
|-------------------------------------------------------------|----------|----------------------------|-------|
| -8                                                          | 3.80     | 2.17                       | 5.97  |
| -7                                                          | 3.96     | 2.24                       | 6.20  |
| -6                                                          | 4.35     | 2.25                       | 6.60  |
| -5                                                          | 4.89     | 2.37                       | 7.26  |
| -4                                                          | 5.45     | 2.43                       | 7.88  |
| -3                                                          | 6.12     | 2.56                       | 8.68  |
| -2                                                          | 6.84     | 2.57                       | 9.41  |
| -1                                                          | 6.48     | 2.64                       | 9.13  |
| 0                                                           | 5.33     | 2.46                       | 7.79  |
| 1                                                           | 5.15     | 2.51                       | 7.66  |
| 2                                                           | 5.12     | 2.60                       | 7.72  |
| 3                                                           | 4.90     | 2.69                       | 7.59  |
| 4                                                           | 4.81     | 2.67                       | 7.49  |
| 5                                                           | 4.86     | 2.76                       | 7.62  |
| 6                                                           | 4.90     | 2.82                       | 7.73  |
| 7                                                           | 4.83     | 2.82                       | 7.65  |
| 8                                                           | 4.83     | 2.79                       | 7.62  |

Table H1. Mean primary care non-antibiotic prescription costs (CPRD dataset) per person-quarter (£) - polyps positive.

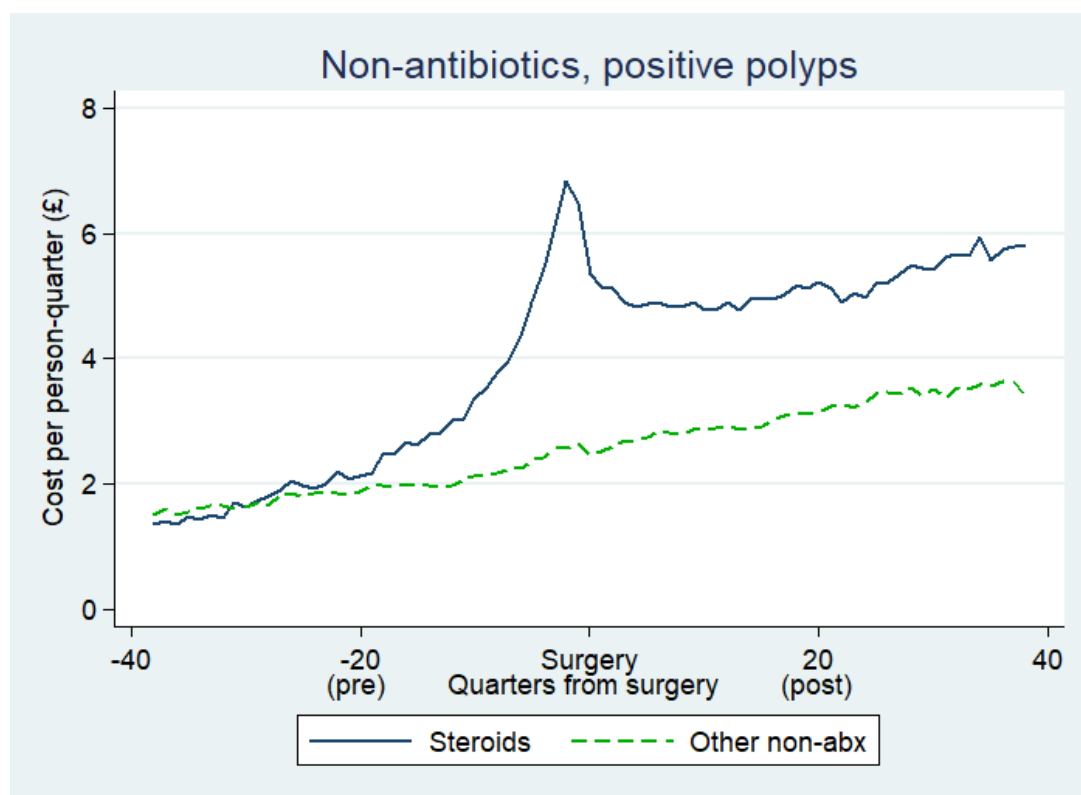



| Quarters after surgery<br>(surgery date at centre of<br>Q0) | Steroids    | All other non-<br>abx meds | TOTAL       |
|-------------------------------------------------------------|-------------|----------------------------|-------------|
| -8                                                          | 1.96        | 2.75                       | <b>4.70</b> |
| -7                                                          | 2.09        | 2.81                       | <b>4.89</b> |
| -6                                                          | 2.43        | 2.82                       | <b>5.25</b> |
| -5                                                          | 2.76        | 2.92                       | <b>5.68</b> |
| -4                                                          | 3.22        | 3.03                       | <b>6.25</b> |
| -3                                                          | 3.61        | 3.03                       | <b>6.64</b> |
| -2                                                          | 3.76        | 3.19                       | <b>6.96</b> |
| -1                                                          | 3.43        | 3.13                       | <b>6.56</b> |
| 0                                                           | <b>2.62</b> | <b>2.93</b>                | <b>5.54</b> |
| 1                                                           | 2.63        | 3.00                       | <b>5.63</b> |
| 2                                                           | 2.47        | 3.02                       | <b>5.49</b> |
| 3                                                           | 2.34        | 3.04                       | <b>5.39</b> |
| 4                                                           | 2.50        | 3.04                       | <b>5.54</b> |
| 5                                                           | 2.43        | 3.12                       | <b>5.55</b> |
| 6                                                           | 2.40        | 3.05                       | <b>5.45</b> |
| 7                                                           | 2.31        | 3.05                       | <b>5.36</b> |
| 8                                                           | 2.38        | 3.18                       | <b>5.56</b> |

Table H2. Mean primary care non-antibiotic prescription costs (CPRD dataset) per person-quarter (£) - polyps unknown.

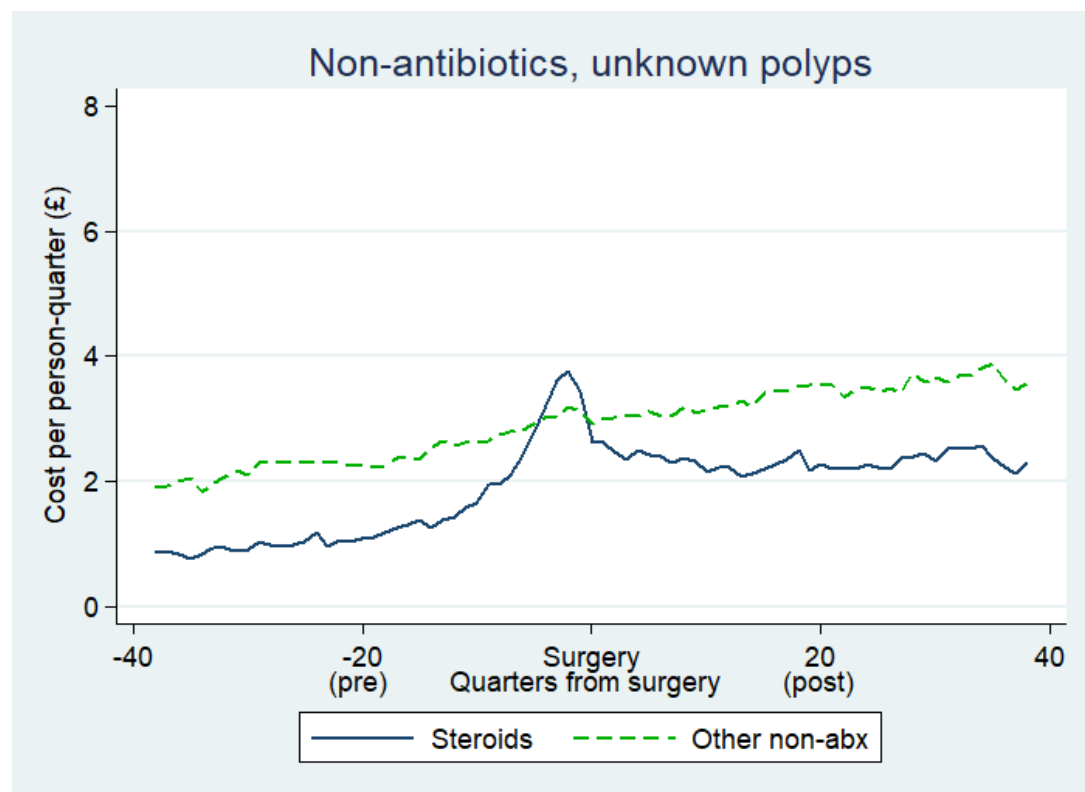

| Quarters after surgery<br>(surgery date at centre of<br>Q0) | Steroids | All other non-<br>abx meds | TOTAL |
|-------------------------------------------------------------|----------|----------------------------|-------|
| -8                                                          | 3.19     | 2.36                       | 5.55  |
| -7                                                          | 3.34     | 2.42                       | 5.77  |
| -6                                                          | 3.72     | 2.44                       | 6.15  |
| -5                                                          | 4.19     | 2.55                       | 6.74  |
| -4                                                          | 4.72     | 2.63                       | 7.35  |
| -3                                                          | 5.30     | 2.71                       | 8.01  |
| -2                                                          | 5.84     | 2.77                       | 8.61  |
| -1                                                          | 5.49     | 2.80                       | 8.29  |
| 0                                                           | 4.45     | 2.61                       | 7.06  |
| 1                                                           | 4.34     | 2.67                       | 7.00  |
| 2                                                           | 4.27     | 2.73                       | 7.00  |
| 3                                                           | 4.09     | 2.80                       | 6.89  |
| 4                                                           | 4.08     | 2.79                       | 6.87  |
| 5                                                           | 4.09     | 2.87                       | 6.96  |
| 6                                                           | 4.12     | 2.89                       | 7.01  |
| 7                                                           | 4.04     | 2.89                       | 6.93  |
| 8                                                           | 4.07     | 2.91                       | 6.98  |

Table H3. Mean primary care non-antibiotic prescription costs (CPRD dataset) per person-quarter (£) – all patients.

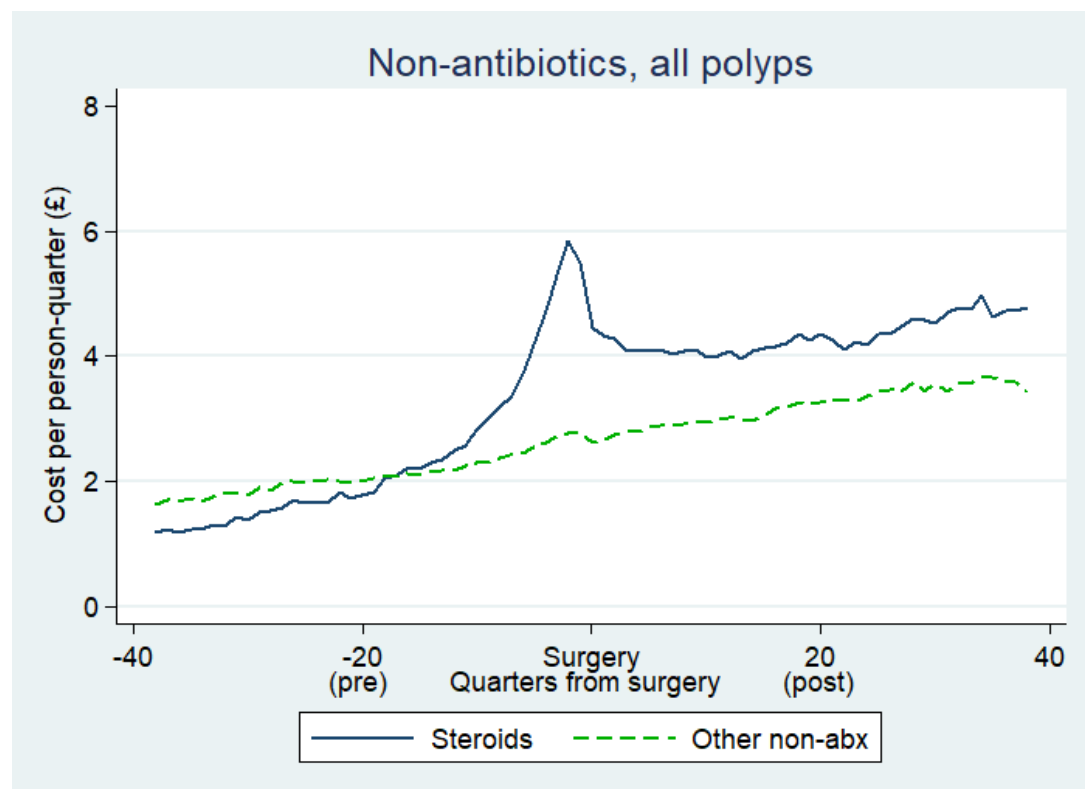

Supplement: bmjopen-2021-055603supp001.pdf [file bmjopen-2021-055603supp001.pdf]
